# Supplementary figures and images for: Image Contrast, Image Pre-Processing, and T1 Mapping Affect MRI Radiomic Feature Repeatability in Patients with Colorectal Cancer Liver Metastases
Source: MDPI journal article supplement (doi:10.3390/cancers13020240), 2021-01-11

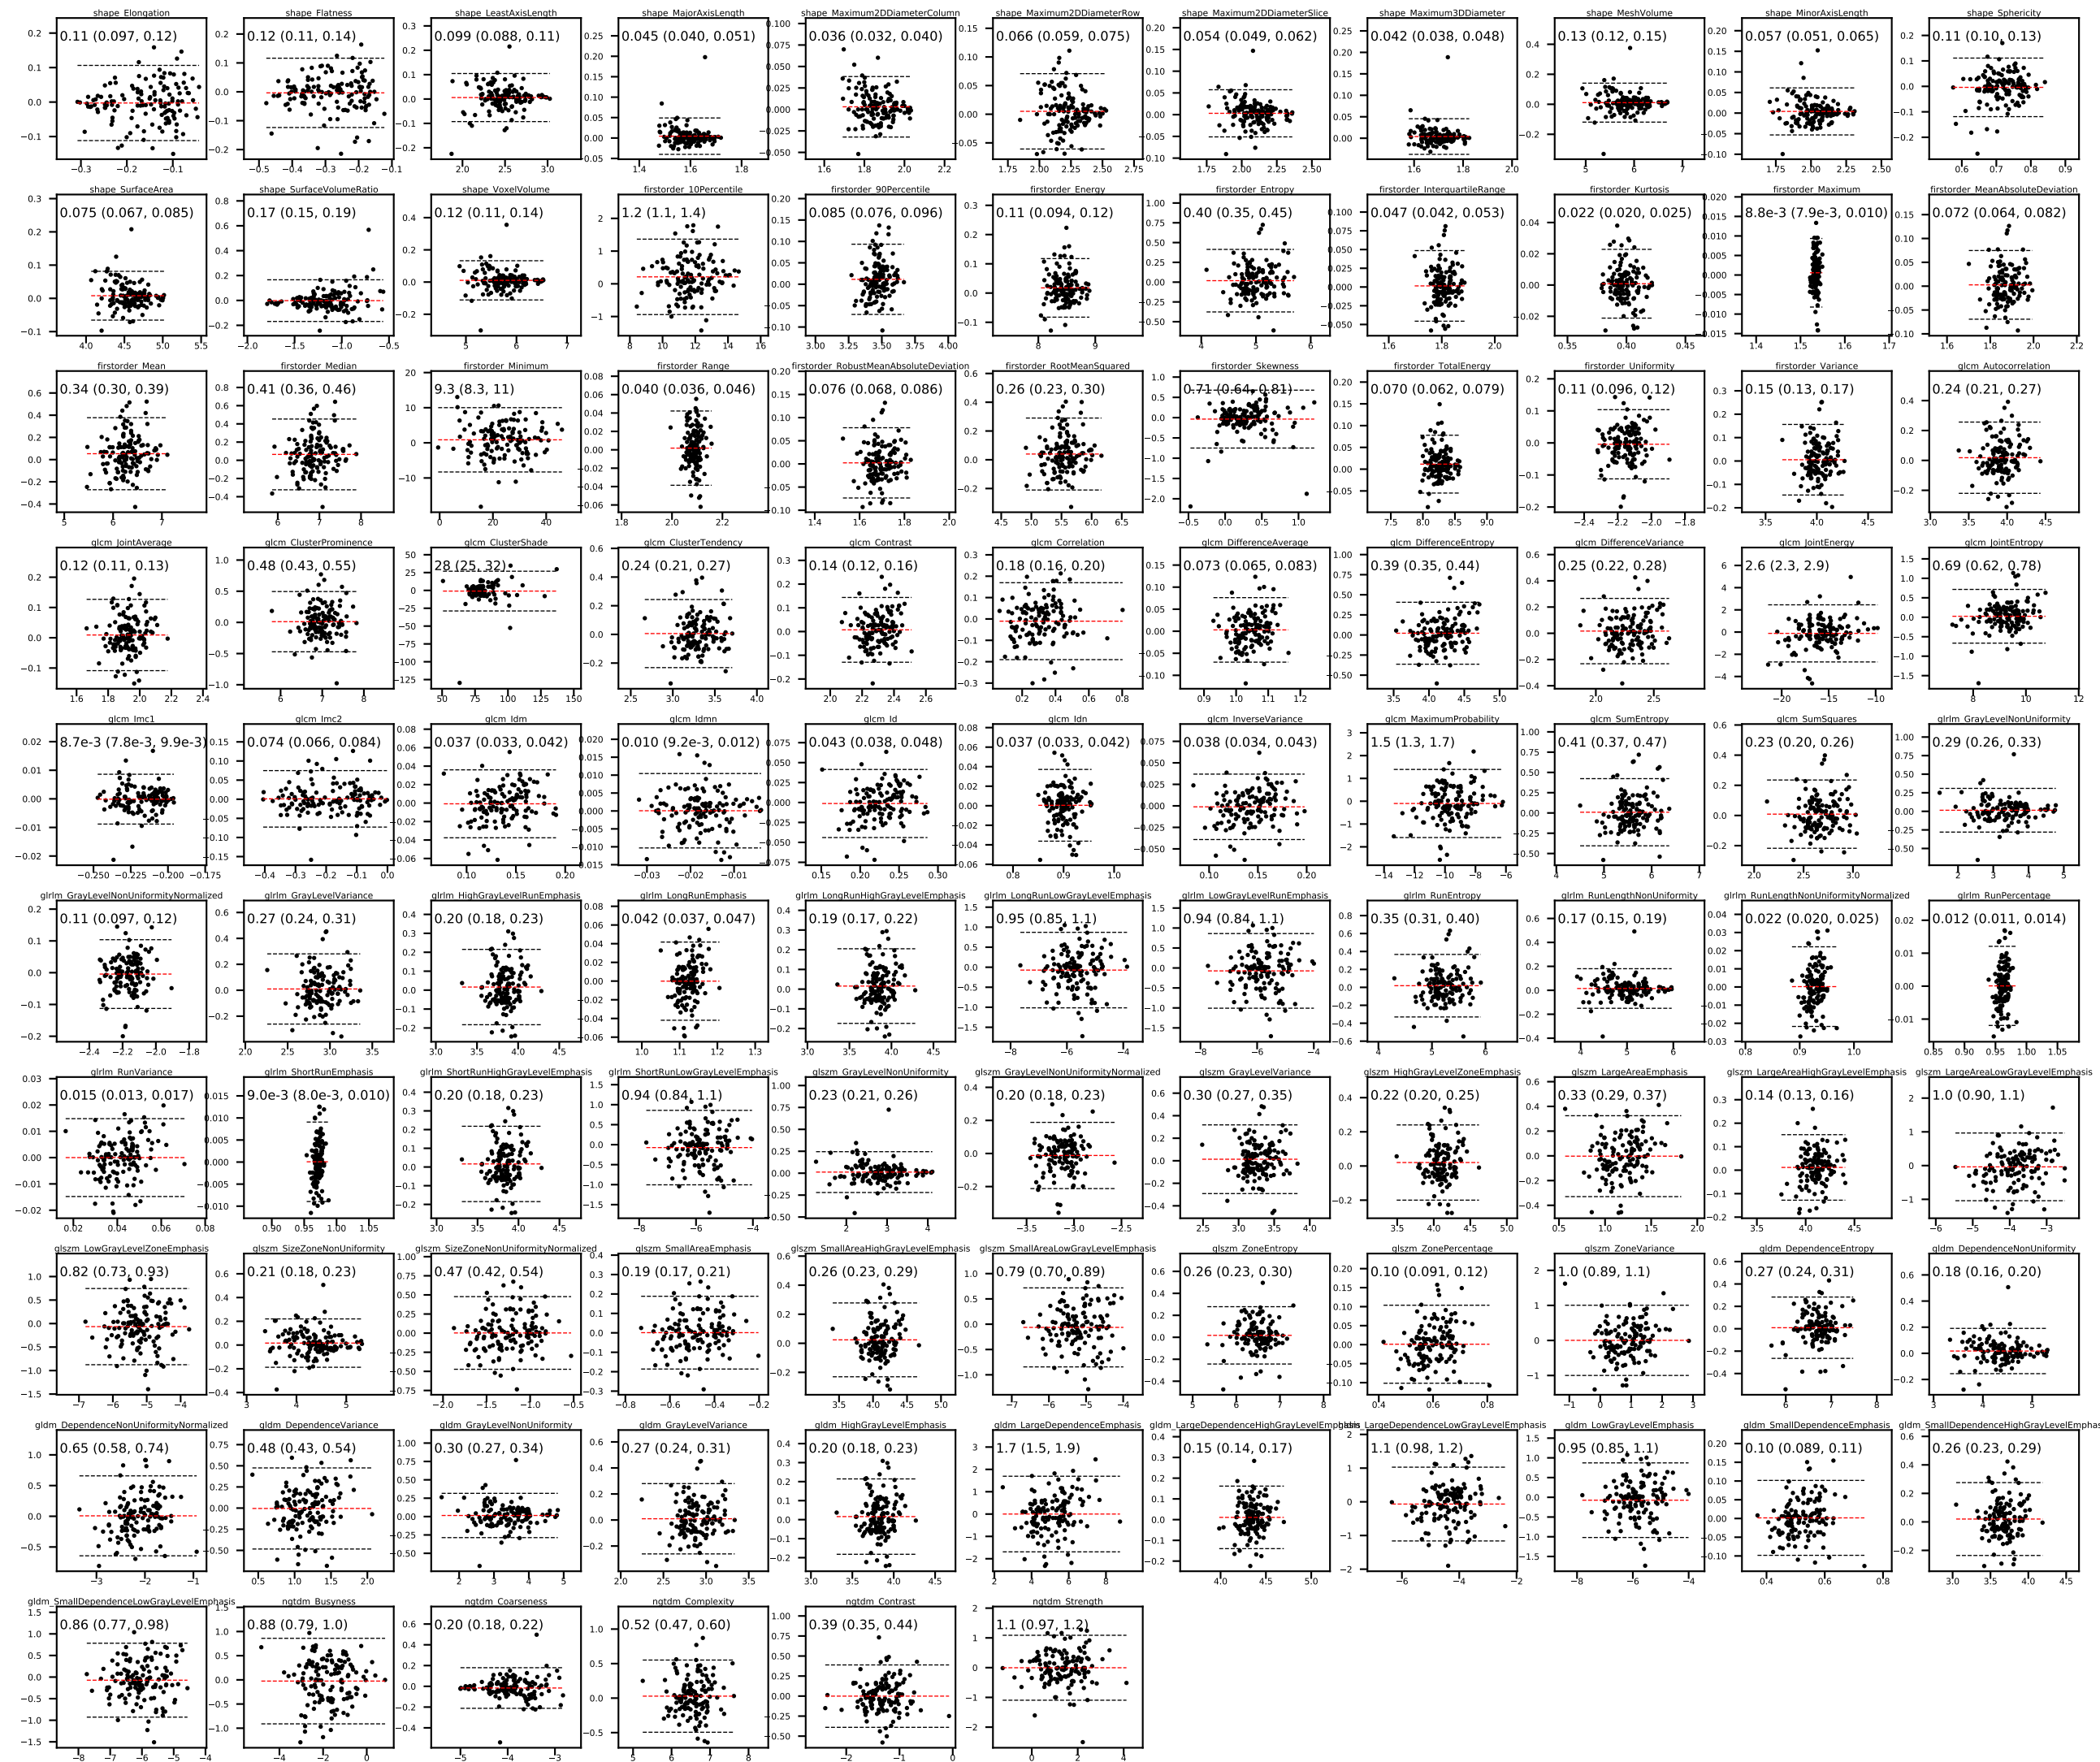

Supplement: s1 [file s1]

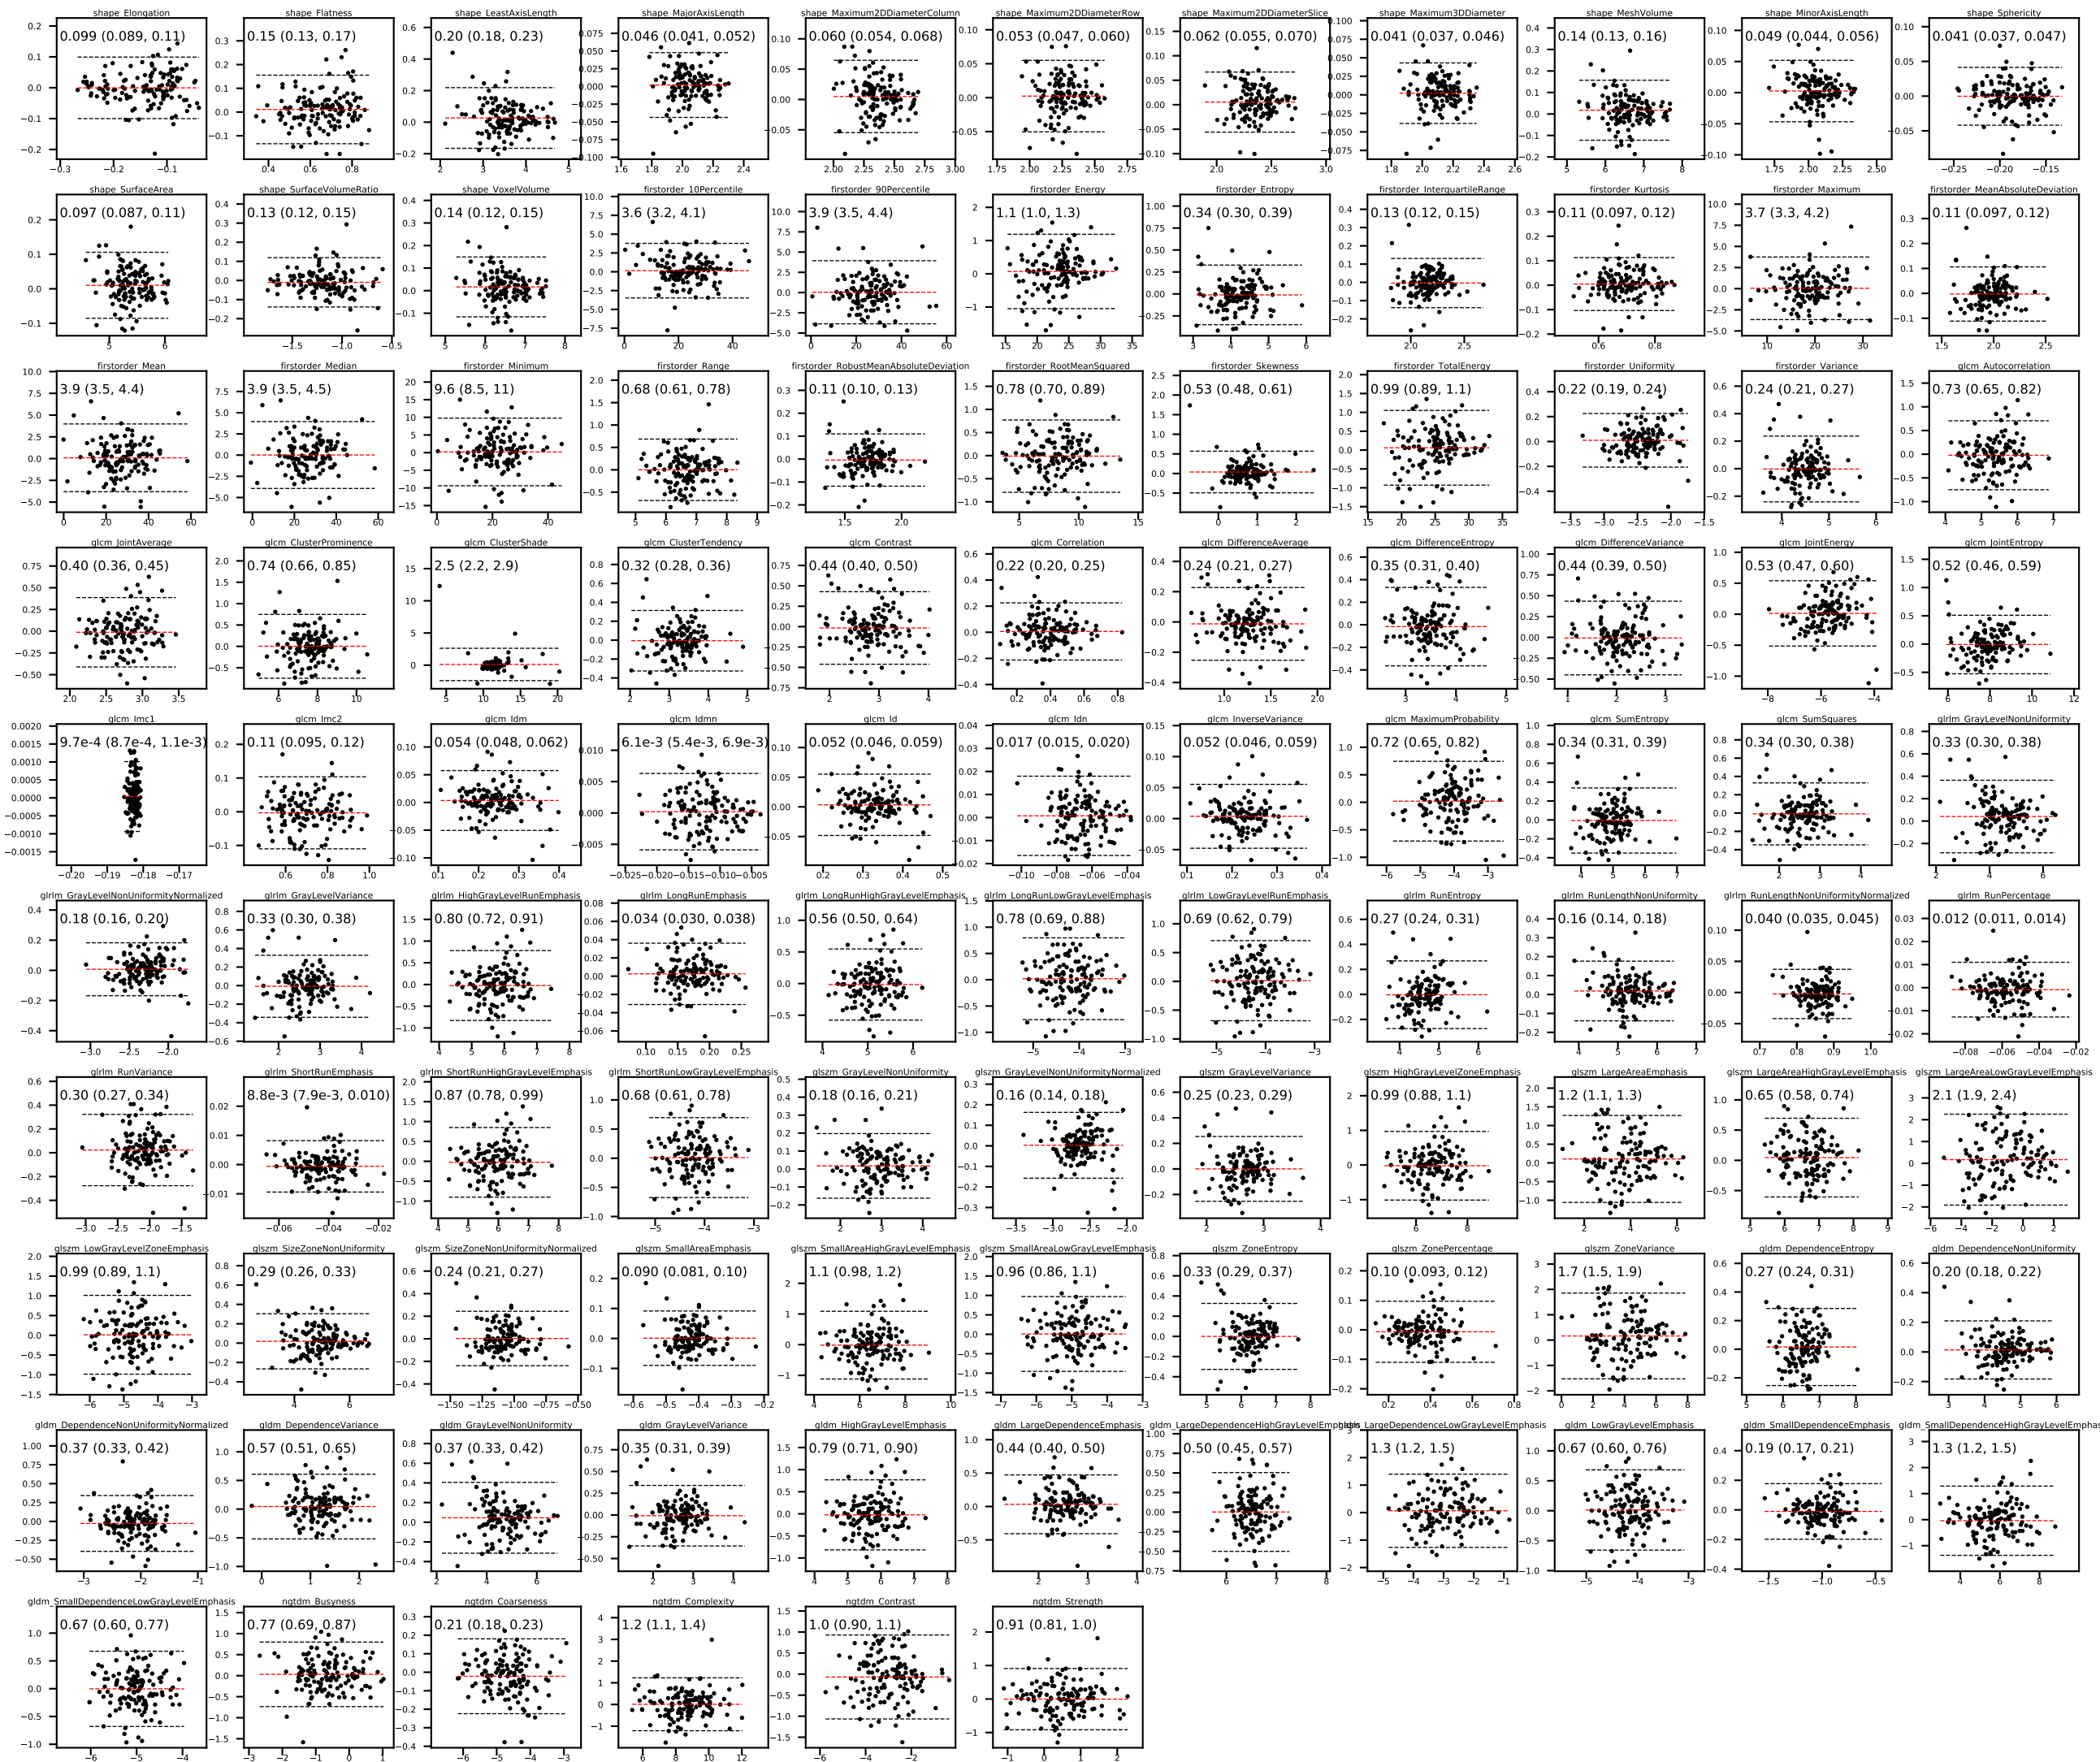

Supplement: s1 [file s1]

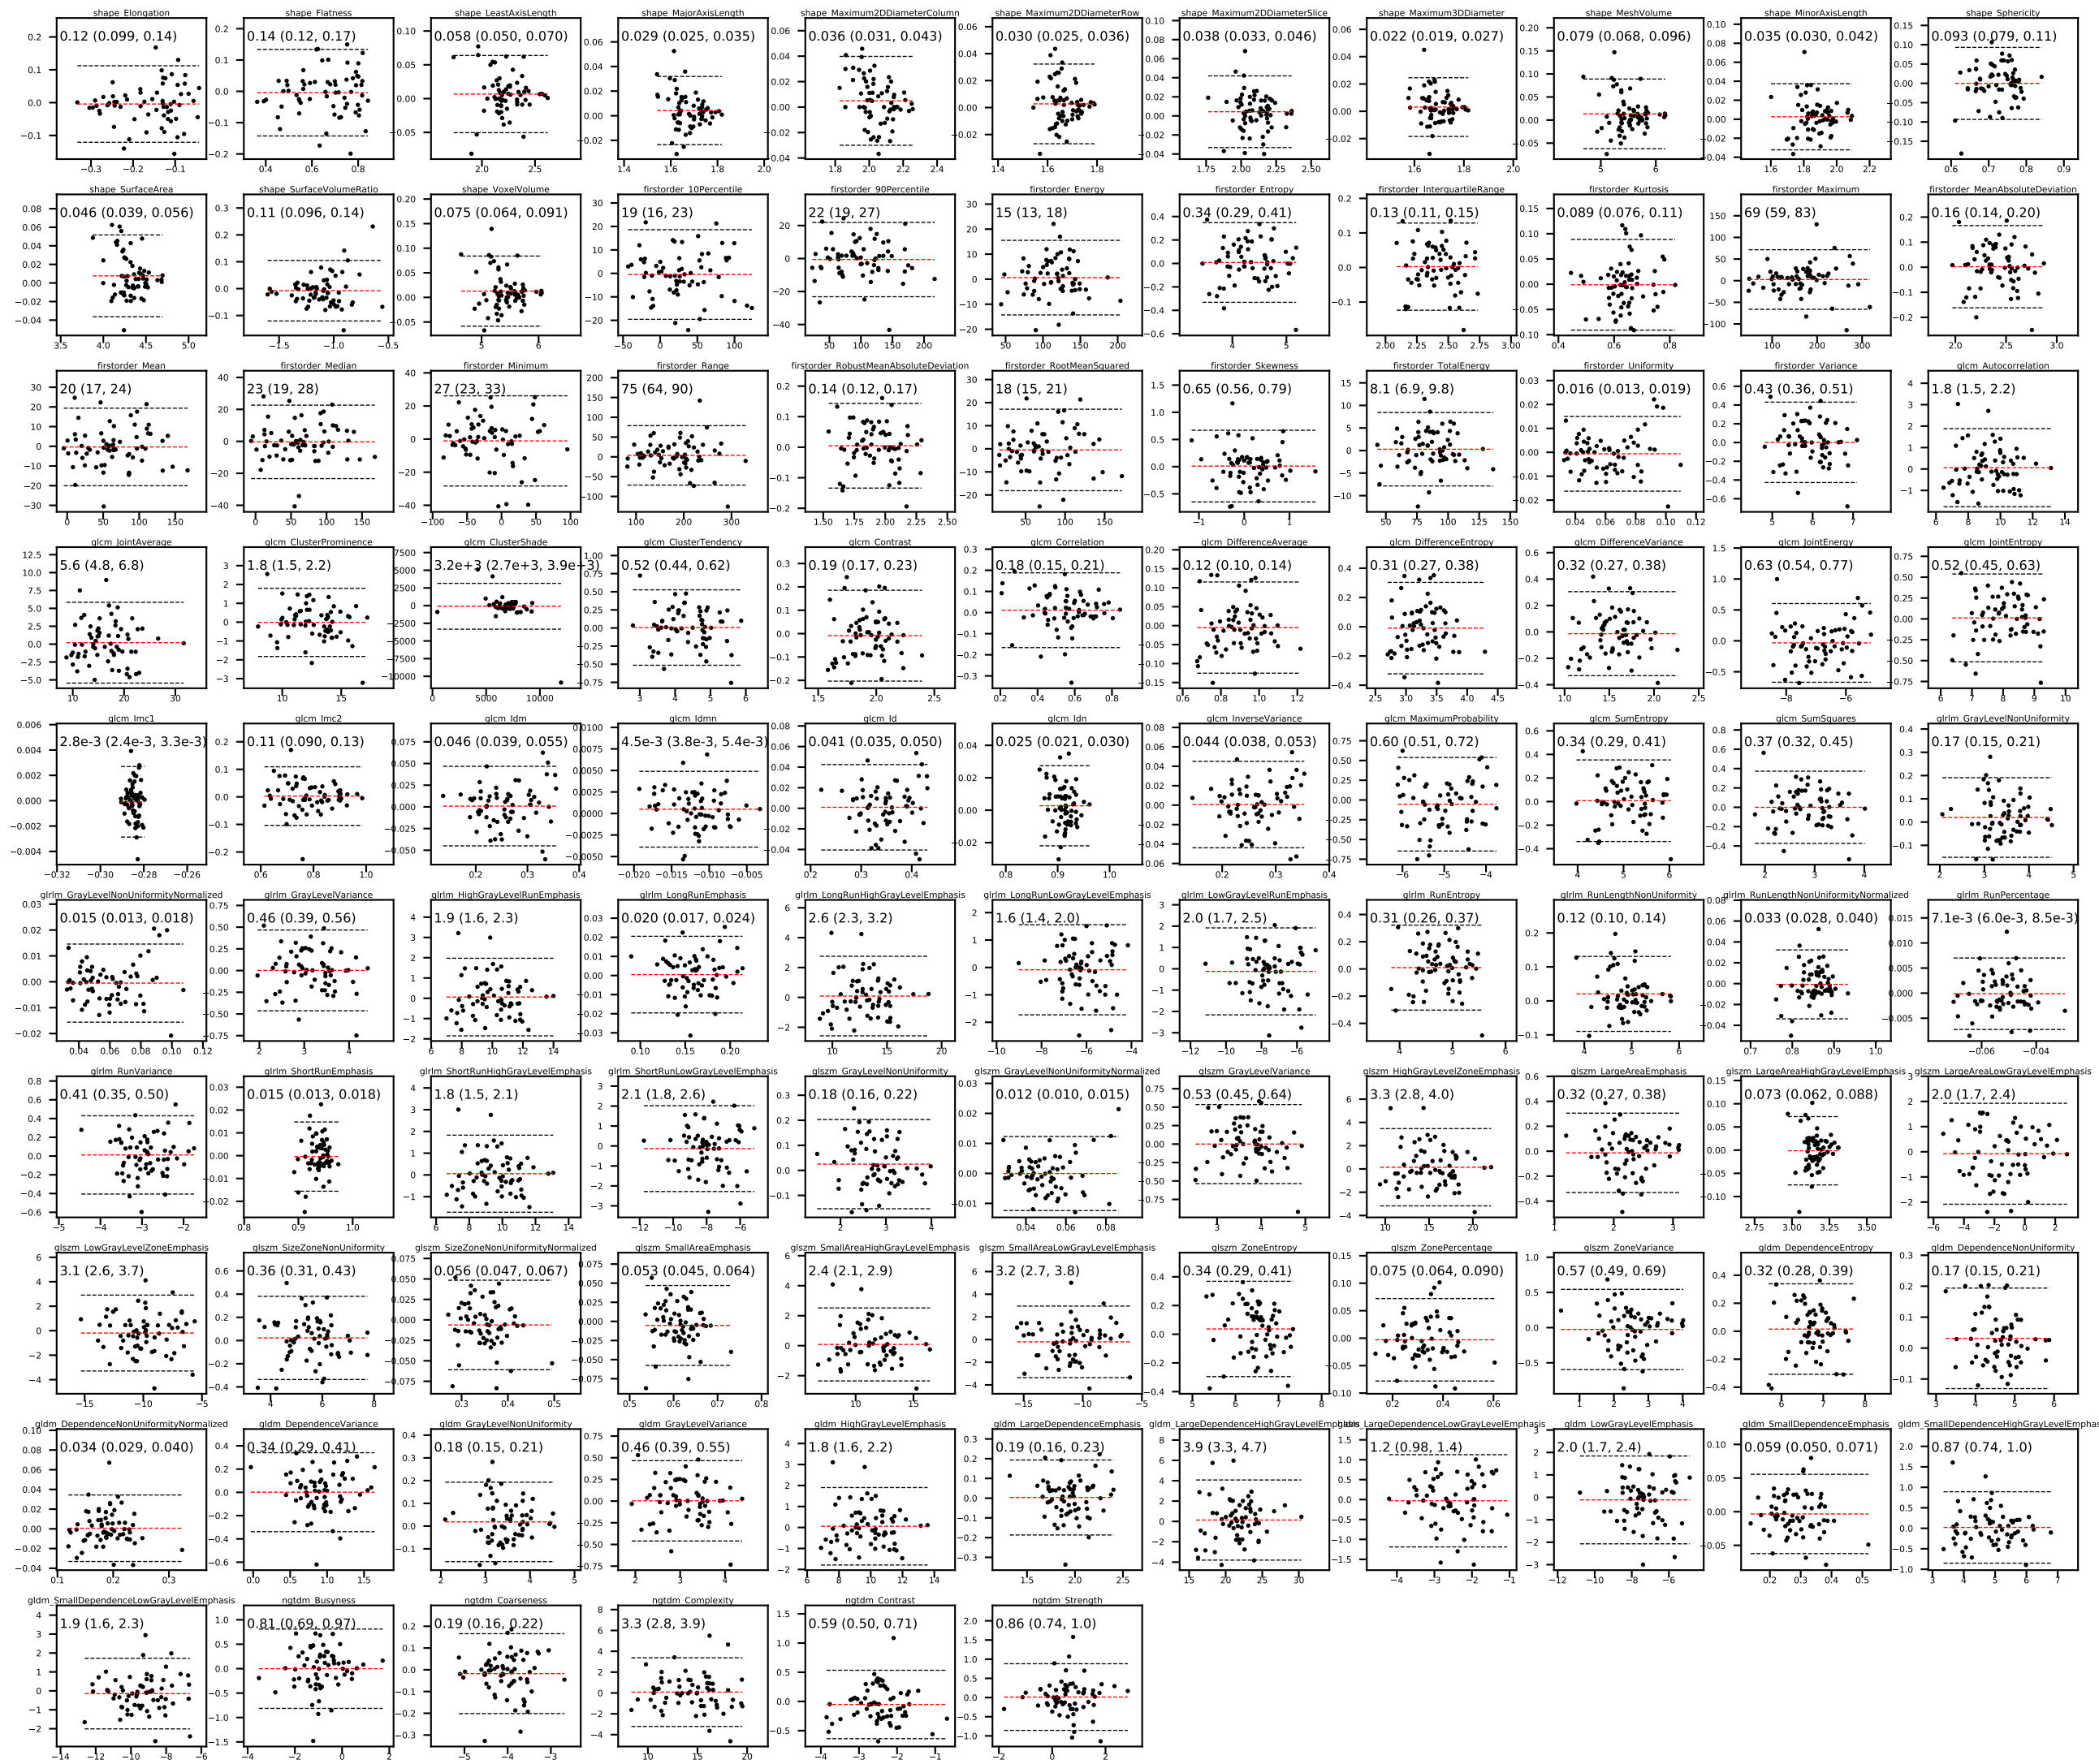

Supplement: s1 [file s1]

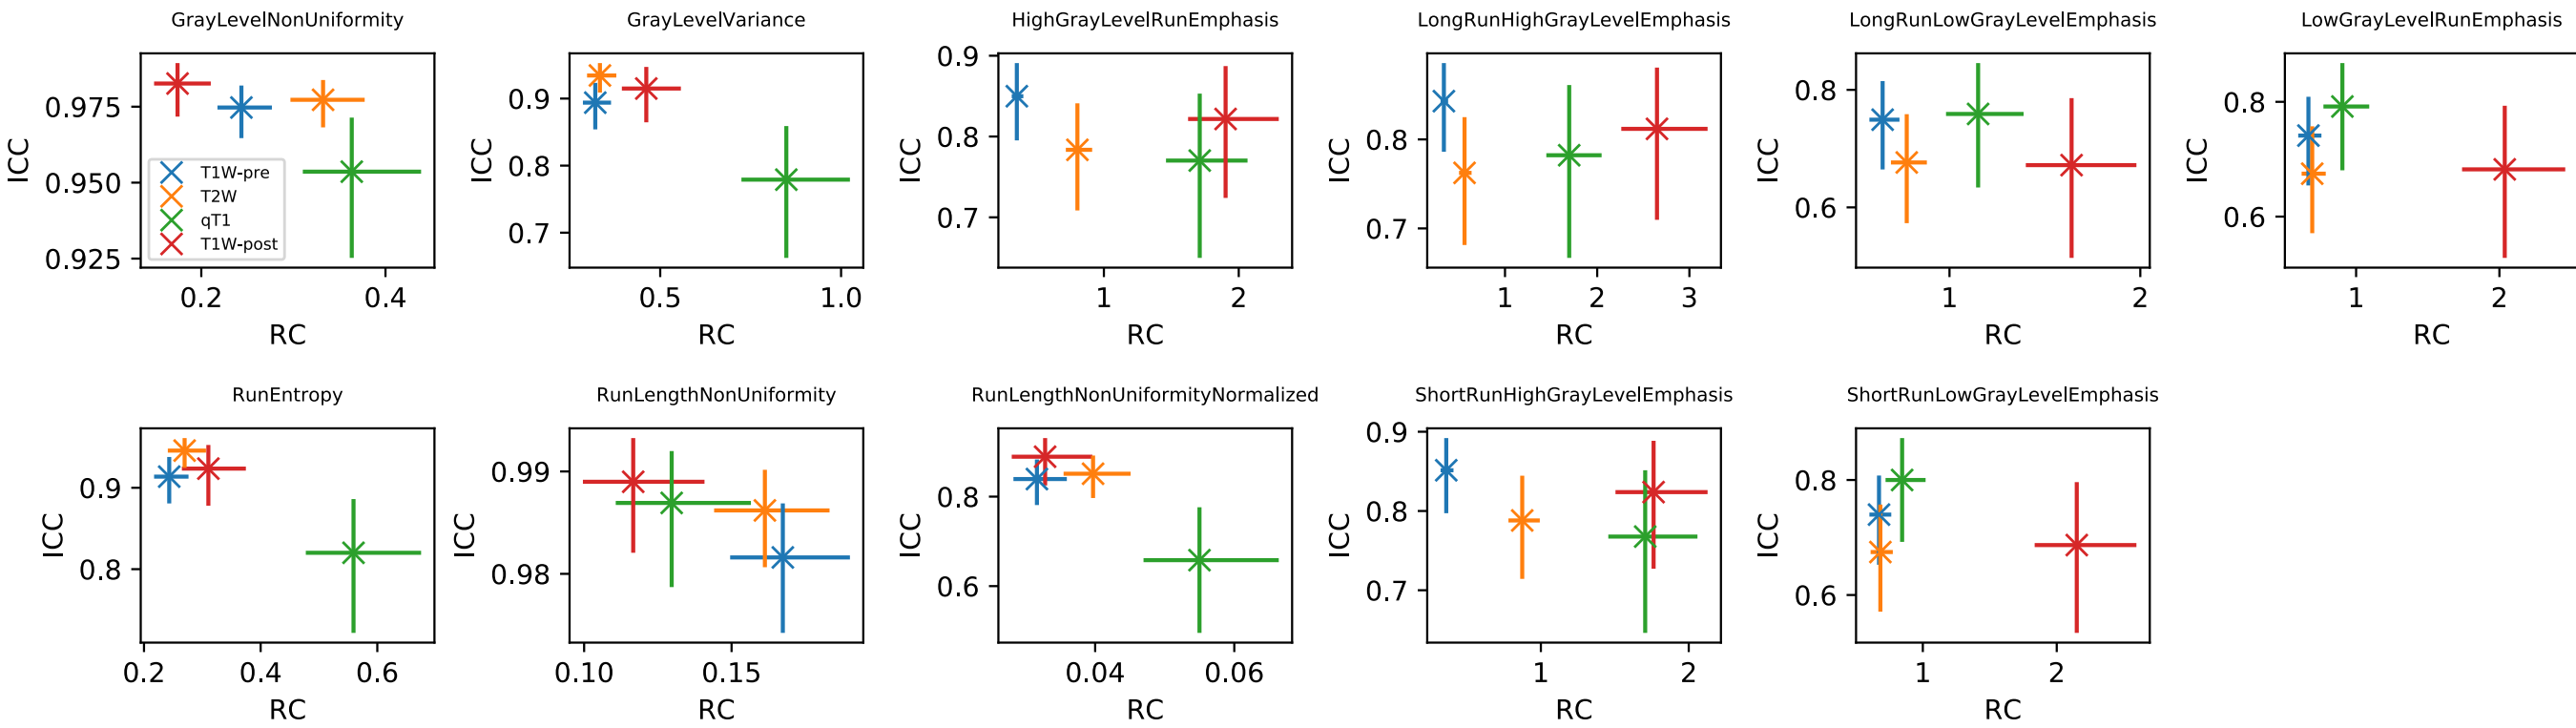

Supplement: s1 [file s1]

**(a)**

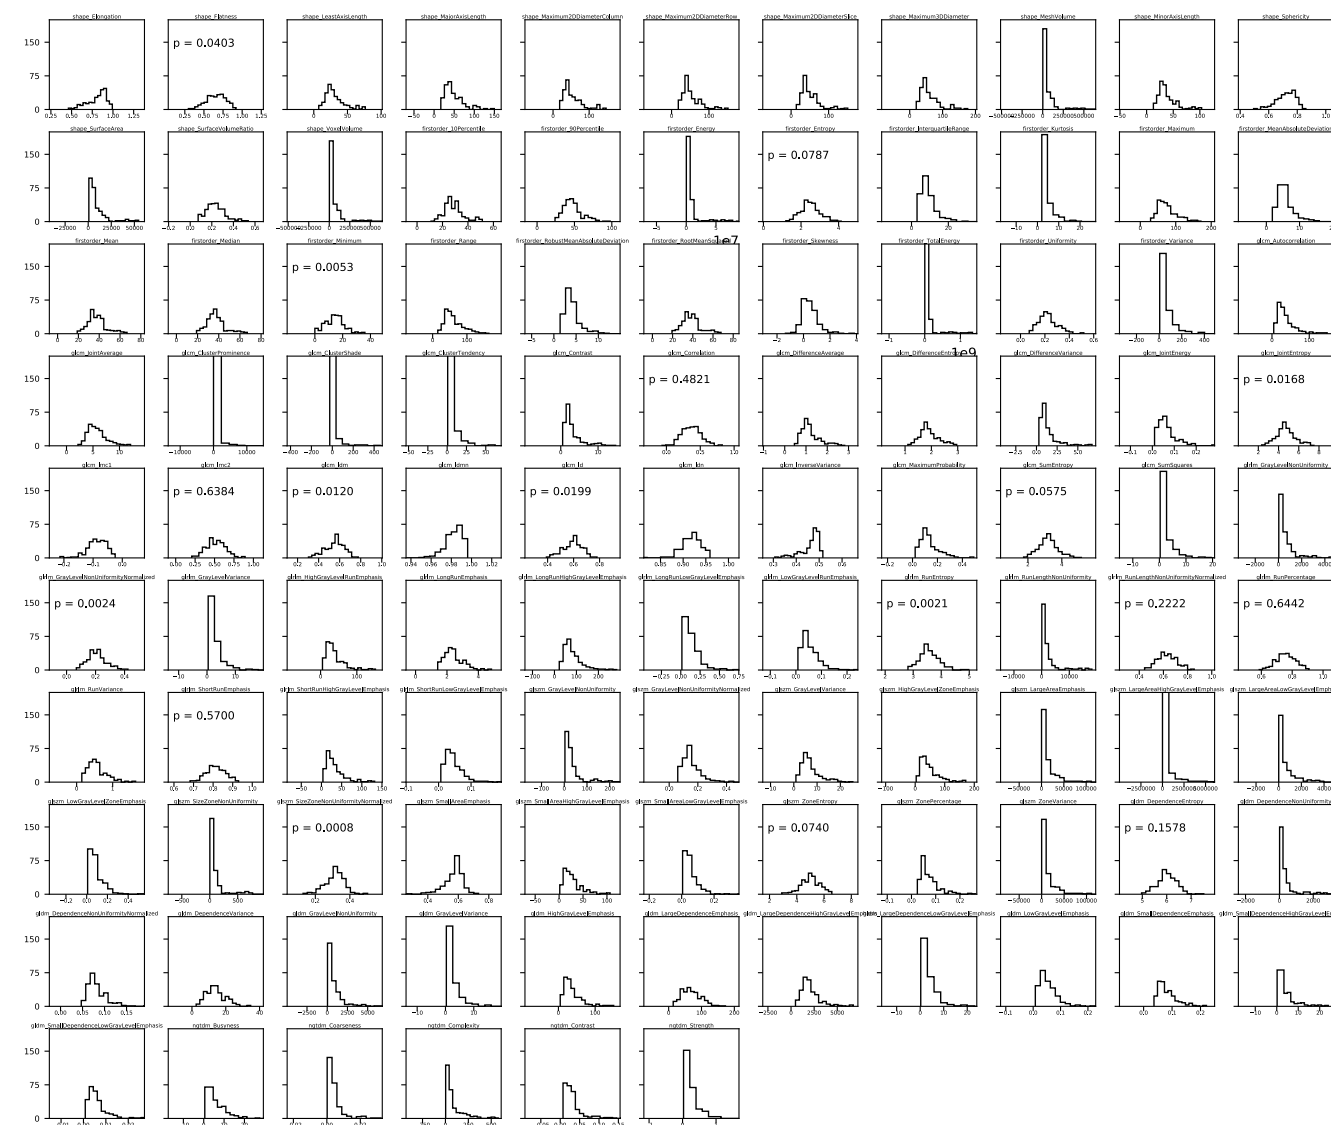

**(c)**

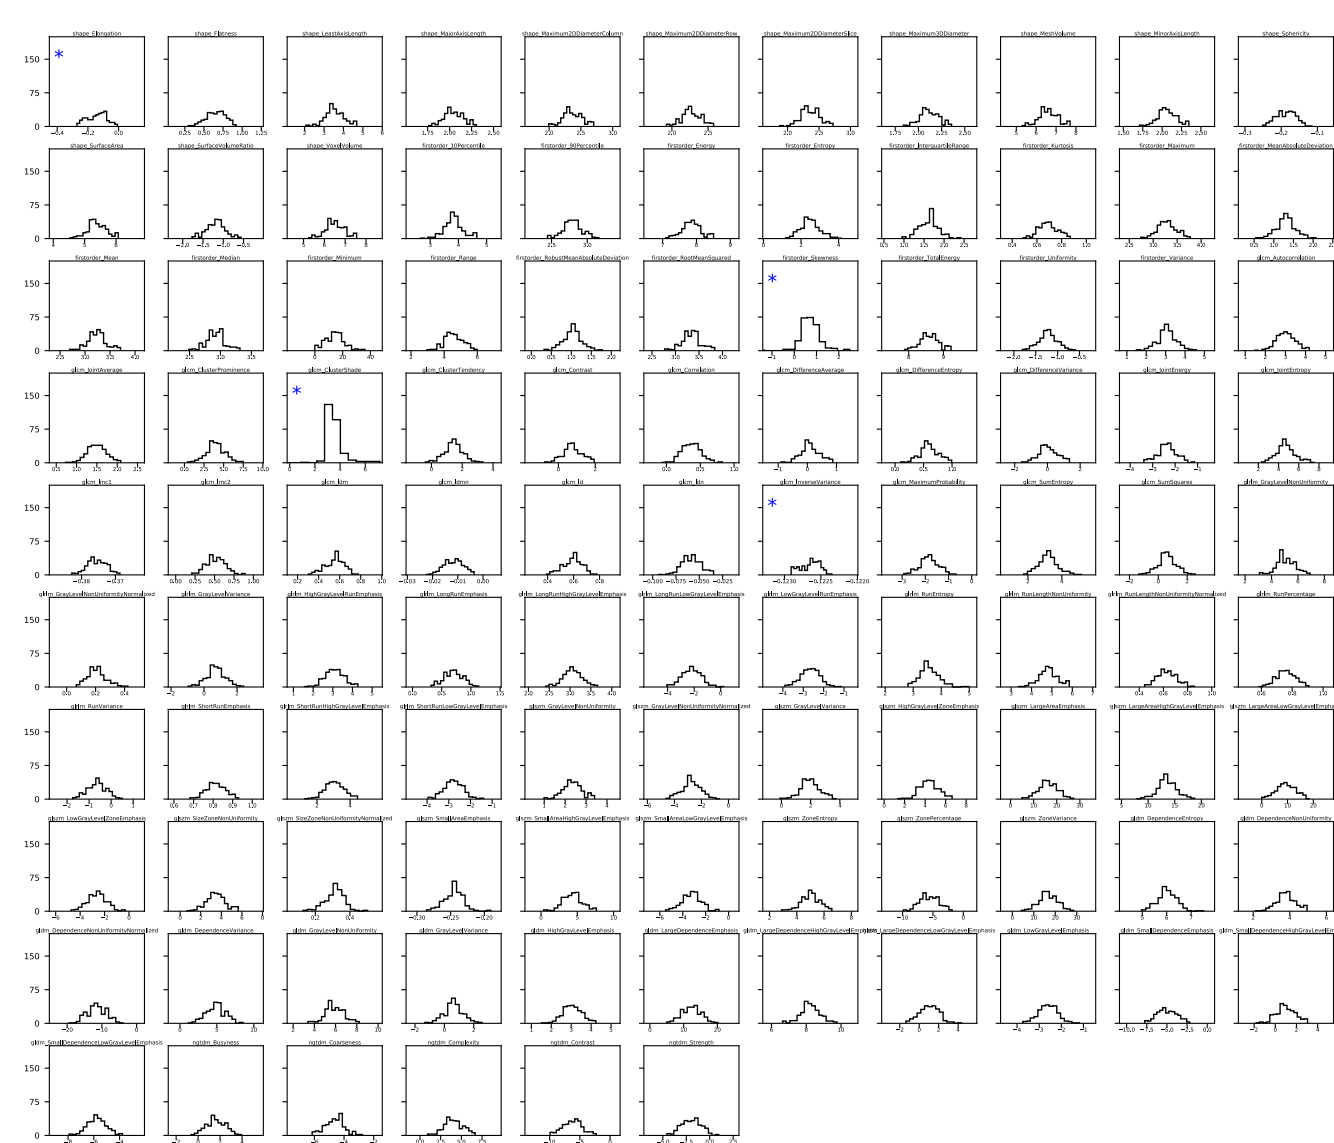

**(b)**

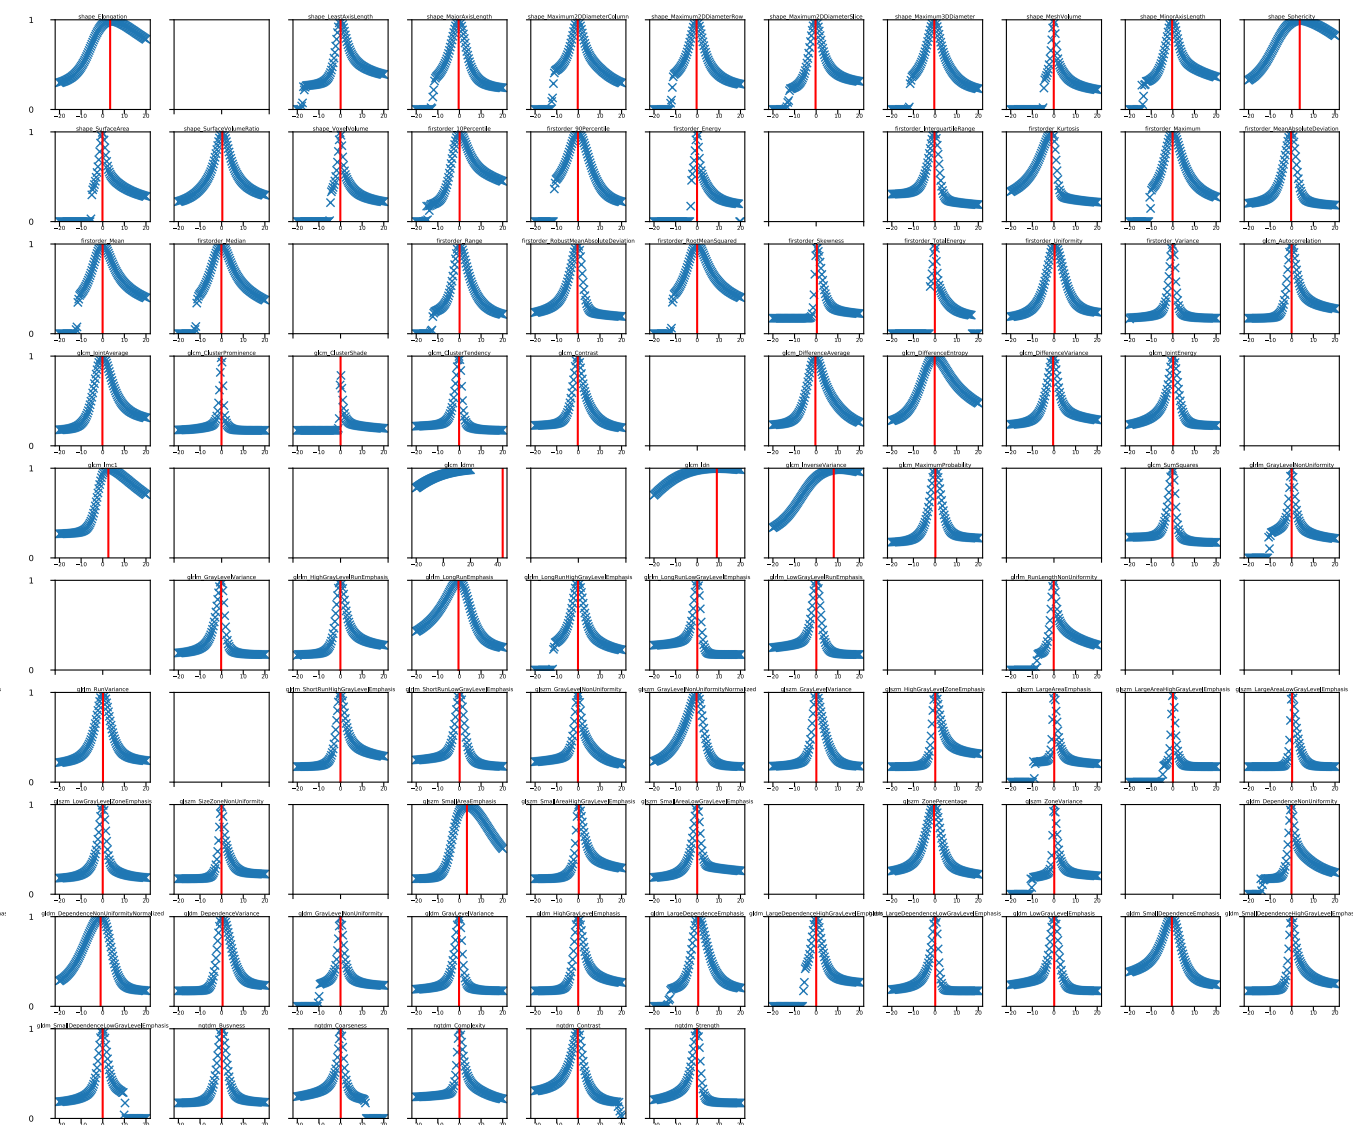

**(d)**

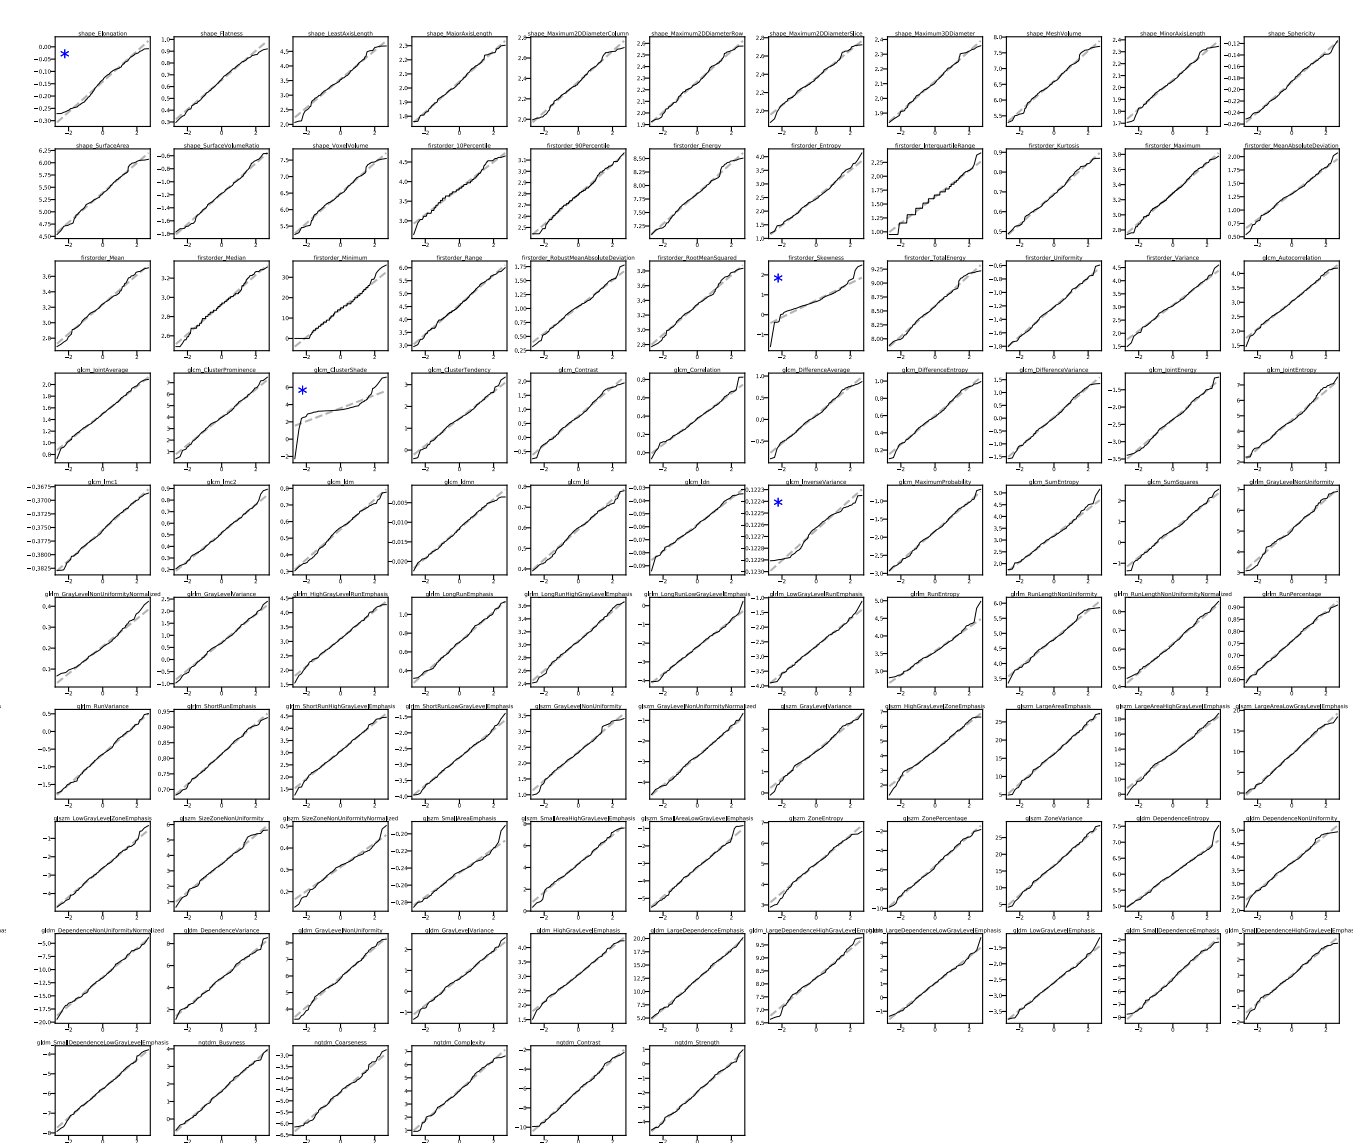

Supplement: s1 [file s1]

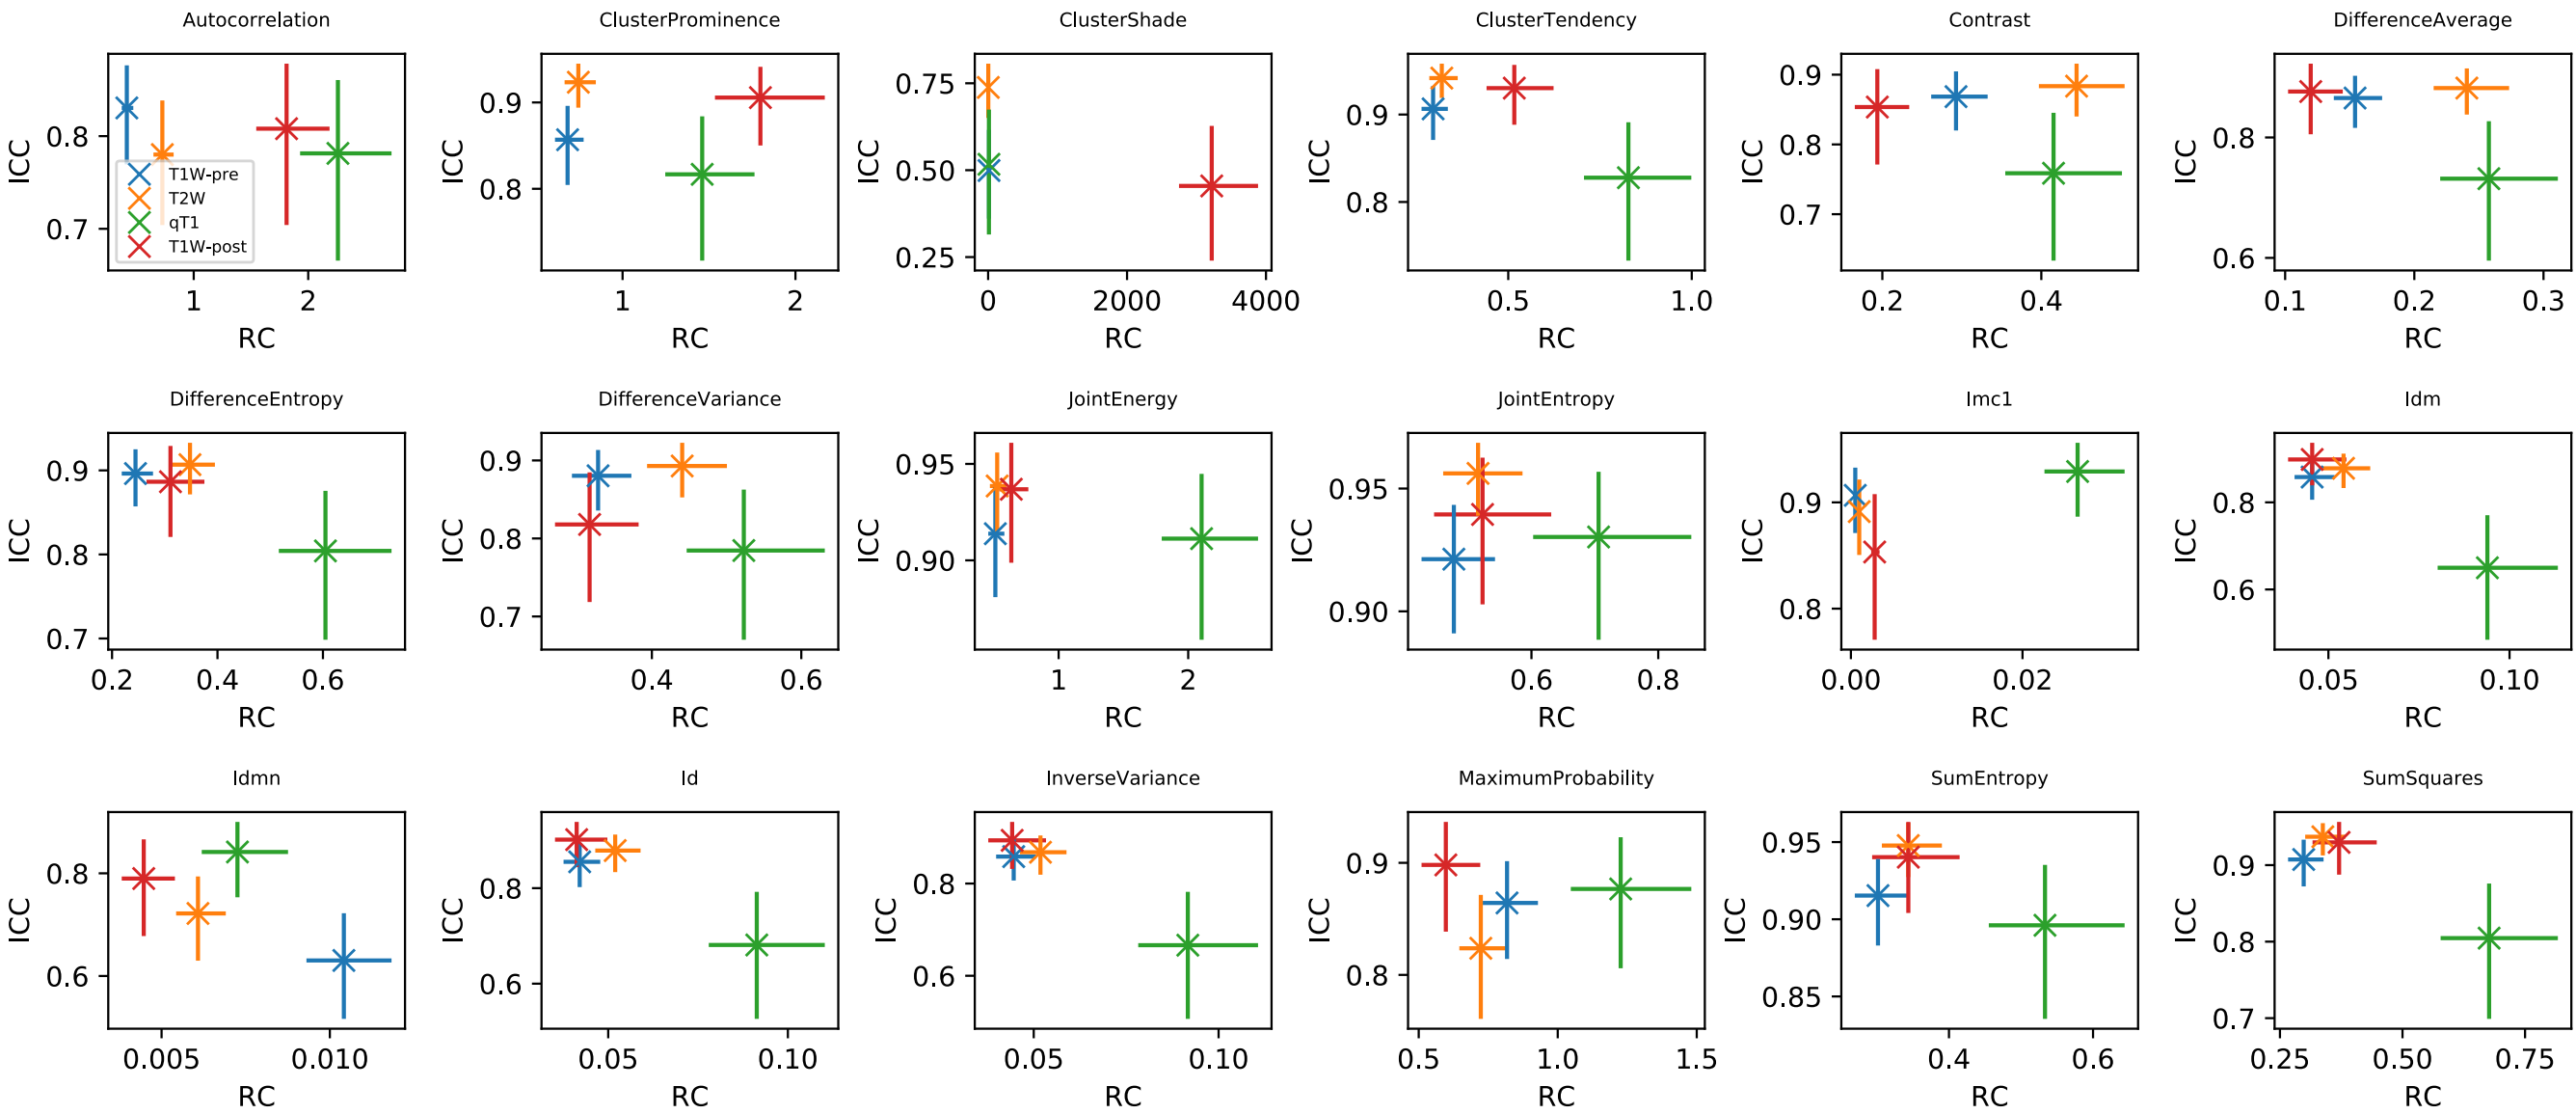

Supplement: s1 [file s1]

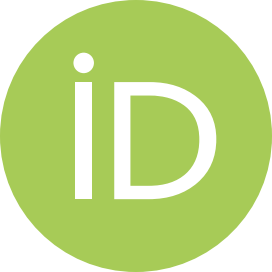

Supplement: s1 [file s1]

**(a)**

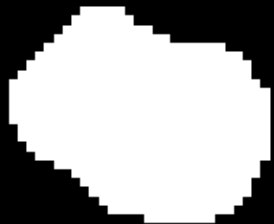

T1W pre-contrast mask  
256 x 256

**(b)**

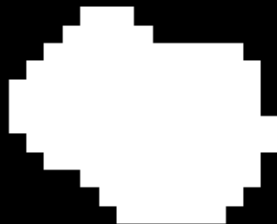

qT1 map mask  
128 x 128

**(c)**

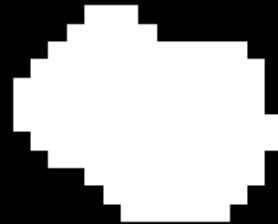

T1 pre-contrast subset mask  
256 x 256

Supplement: s1 [file s1]

(a)

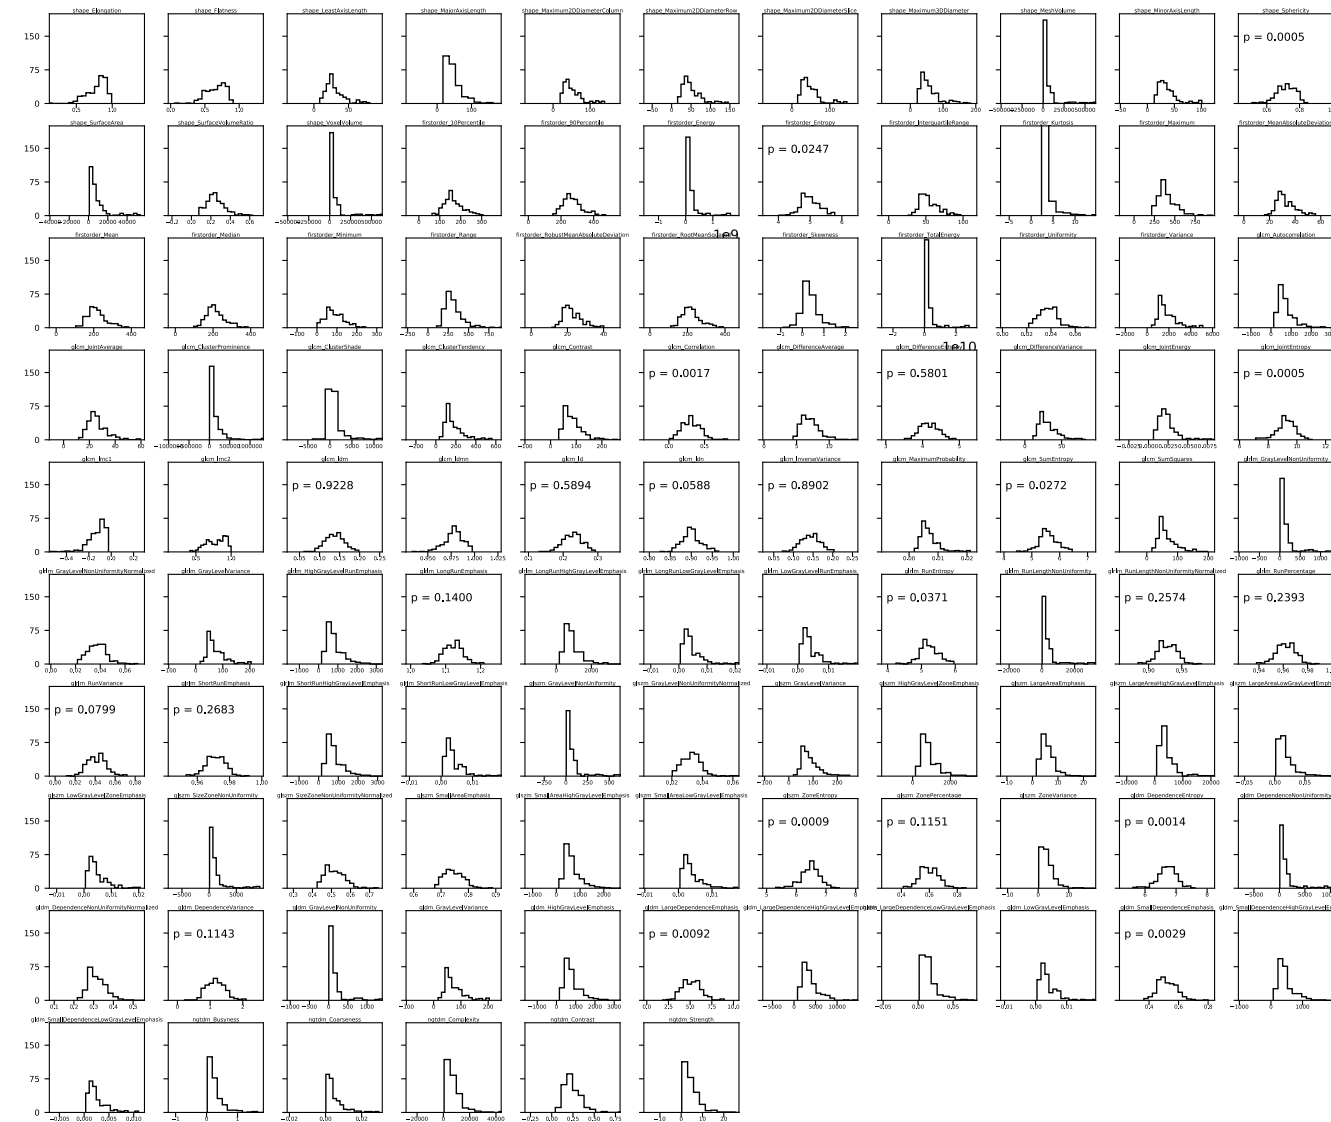

(b)

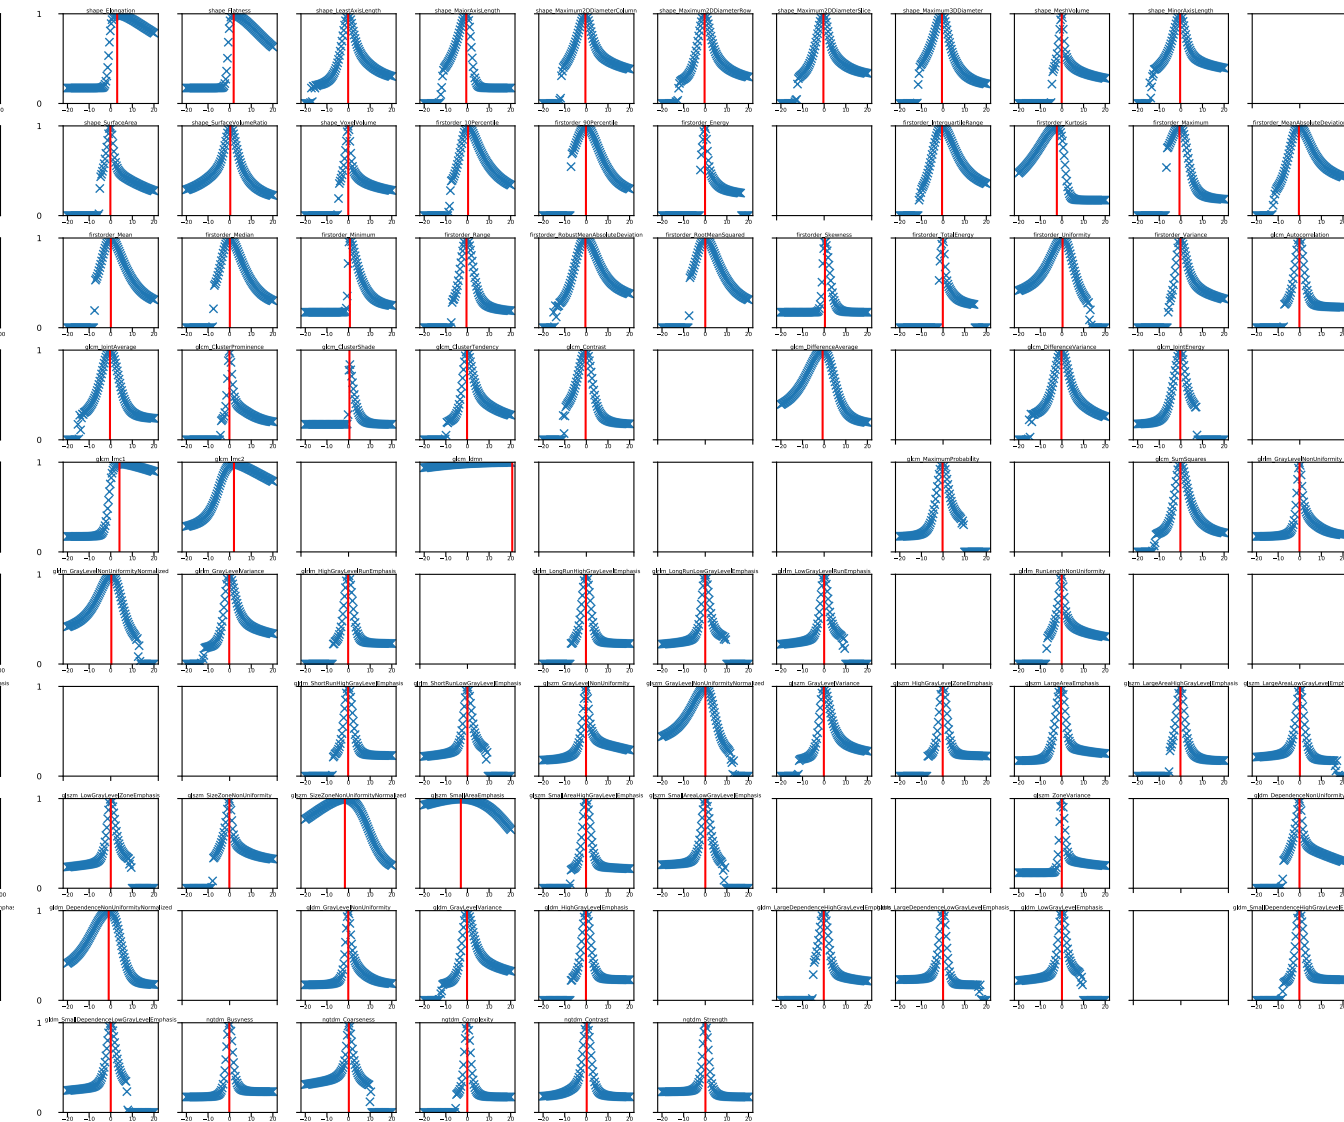

(c)

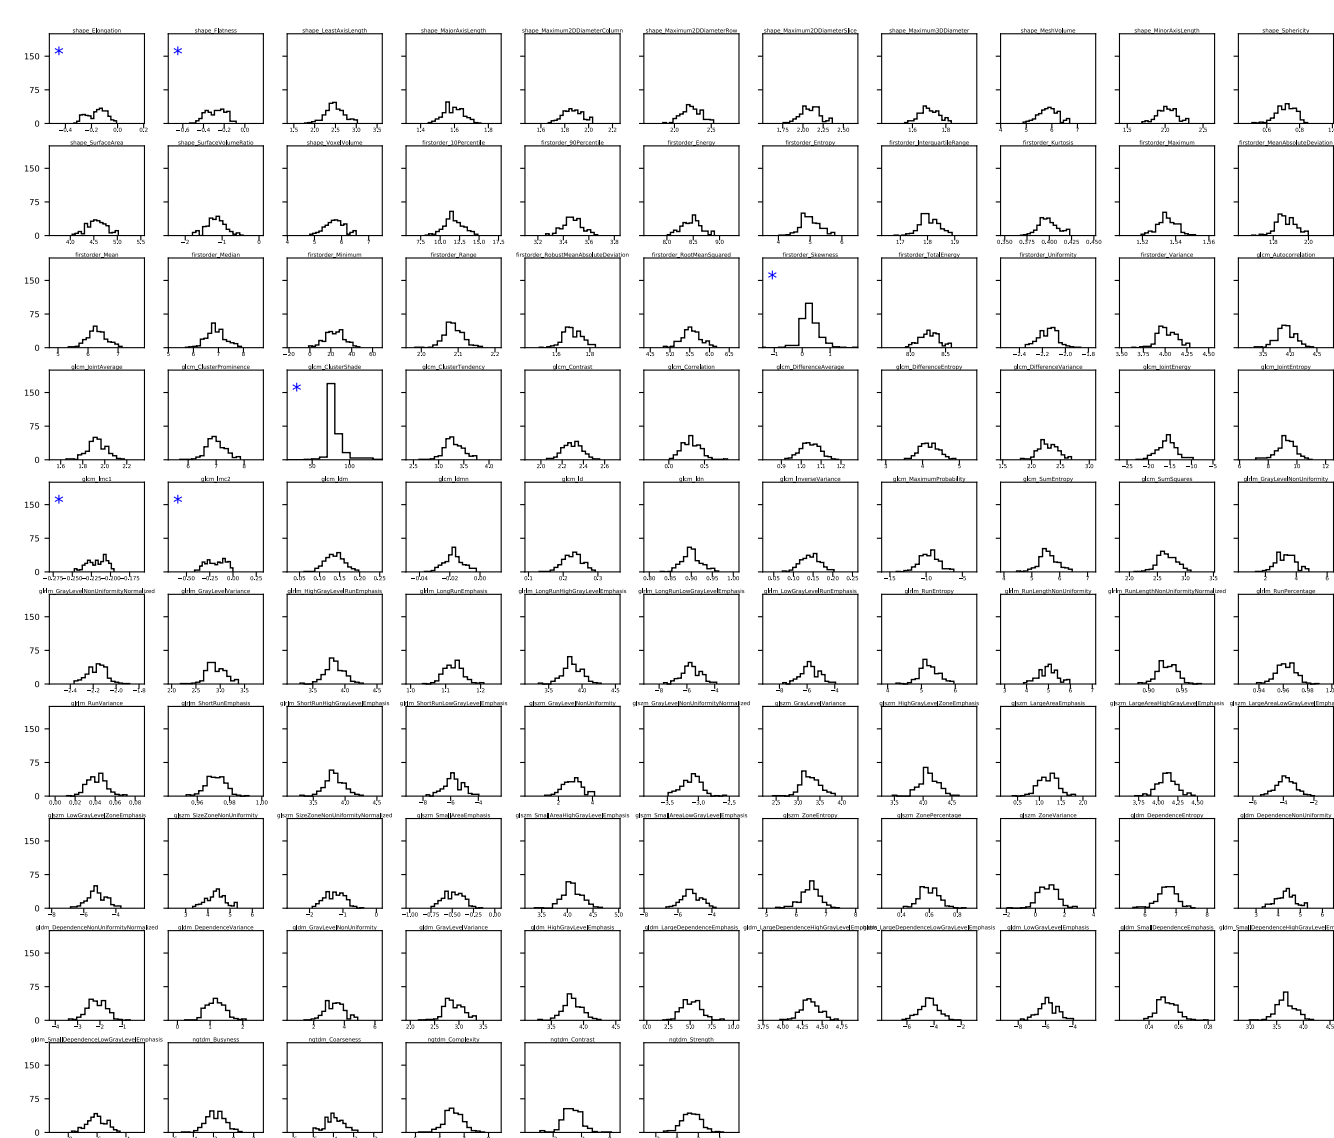

(d)

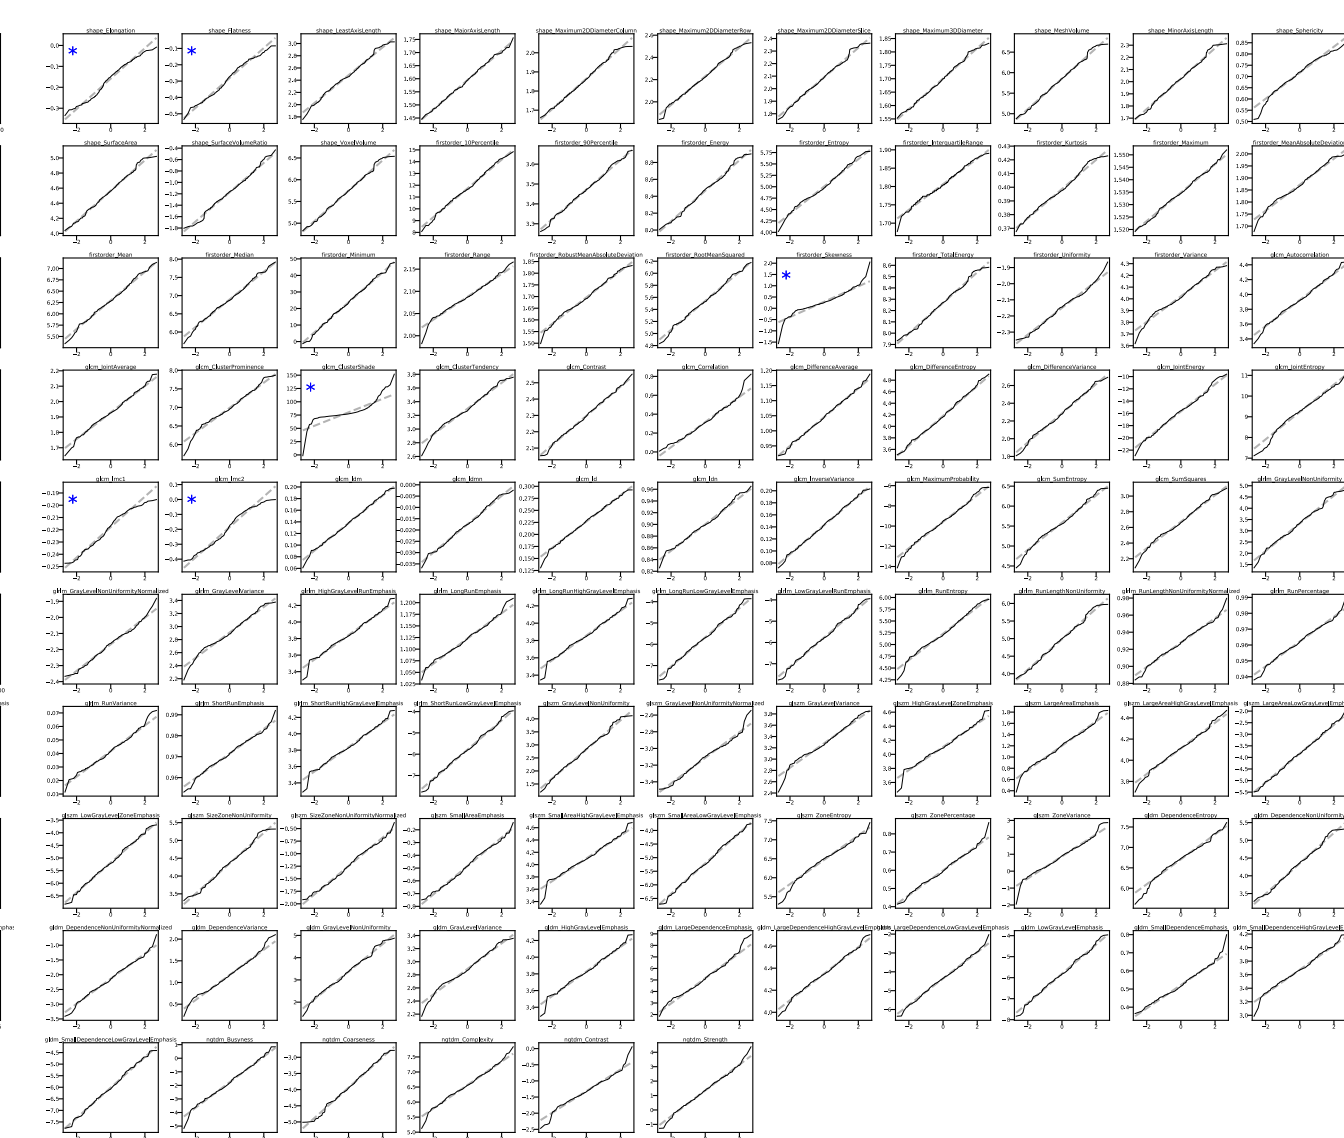

Supplement: s1 [file s1]

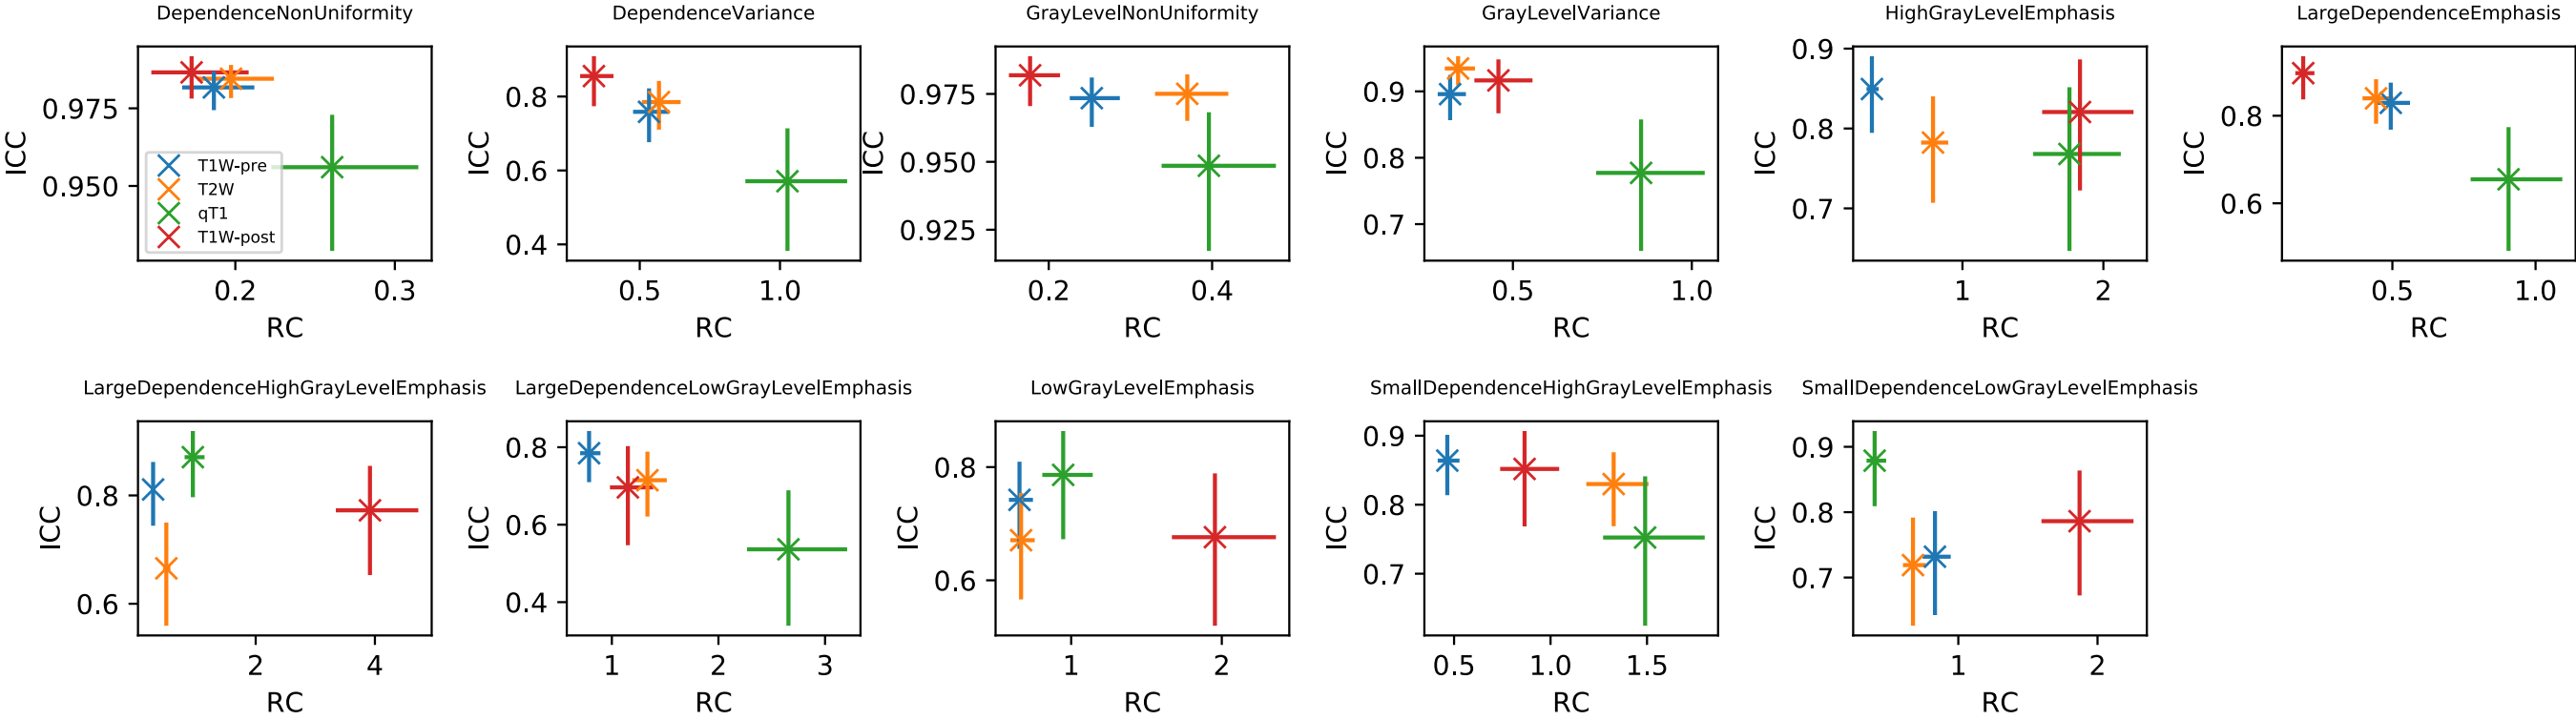

Supplement: s1 [file s1]

Δ transformed ICC  
(Original - Box-Cox)

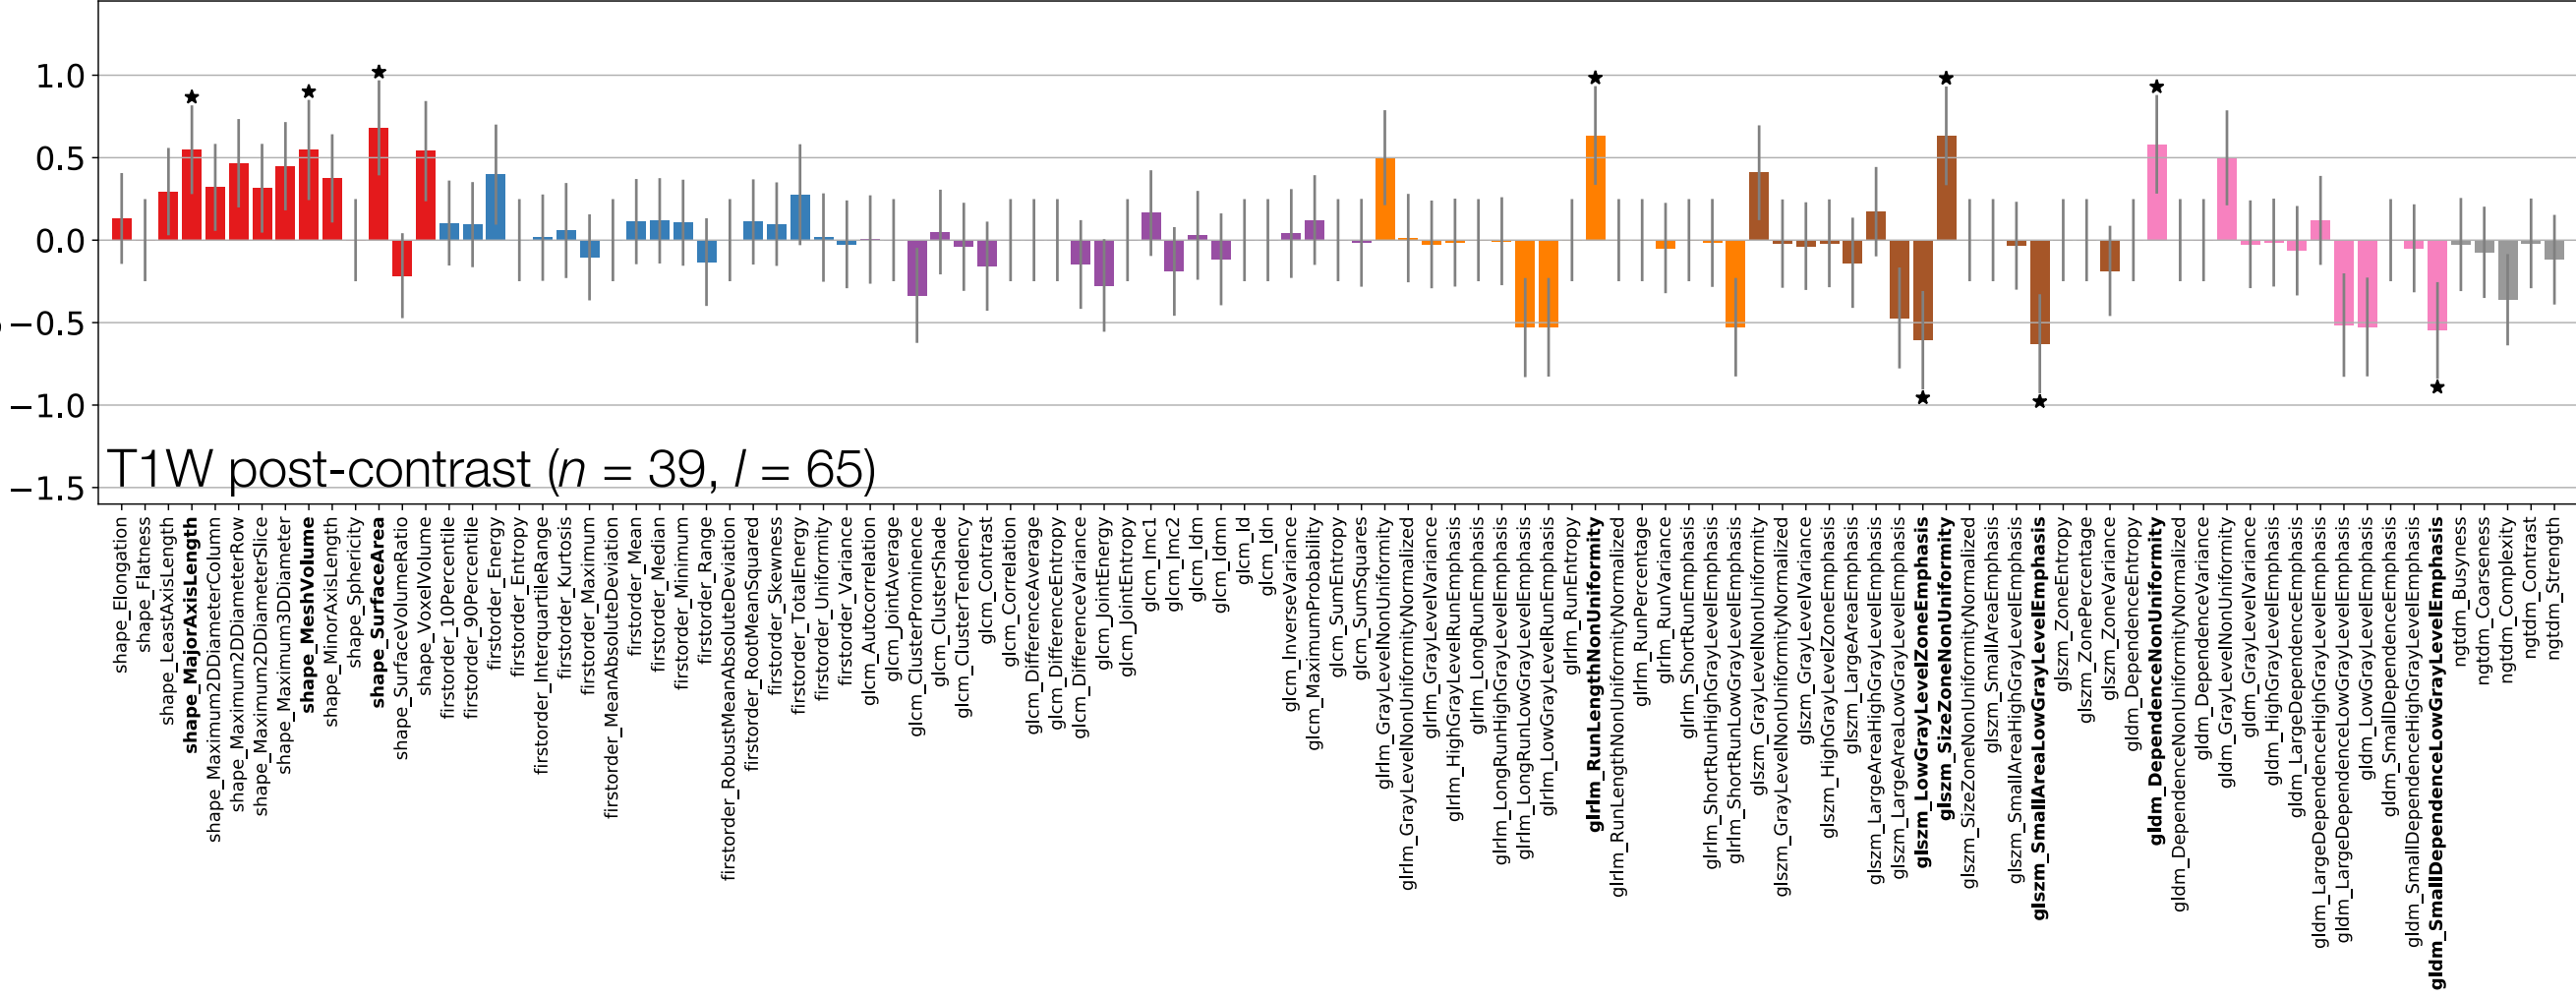

Δ transformed ICC  
(Original - Box-Cox)

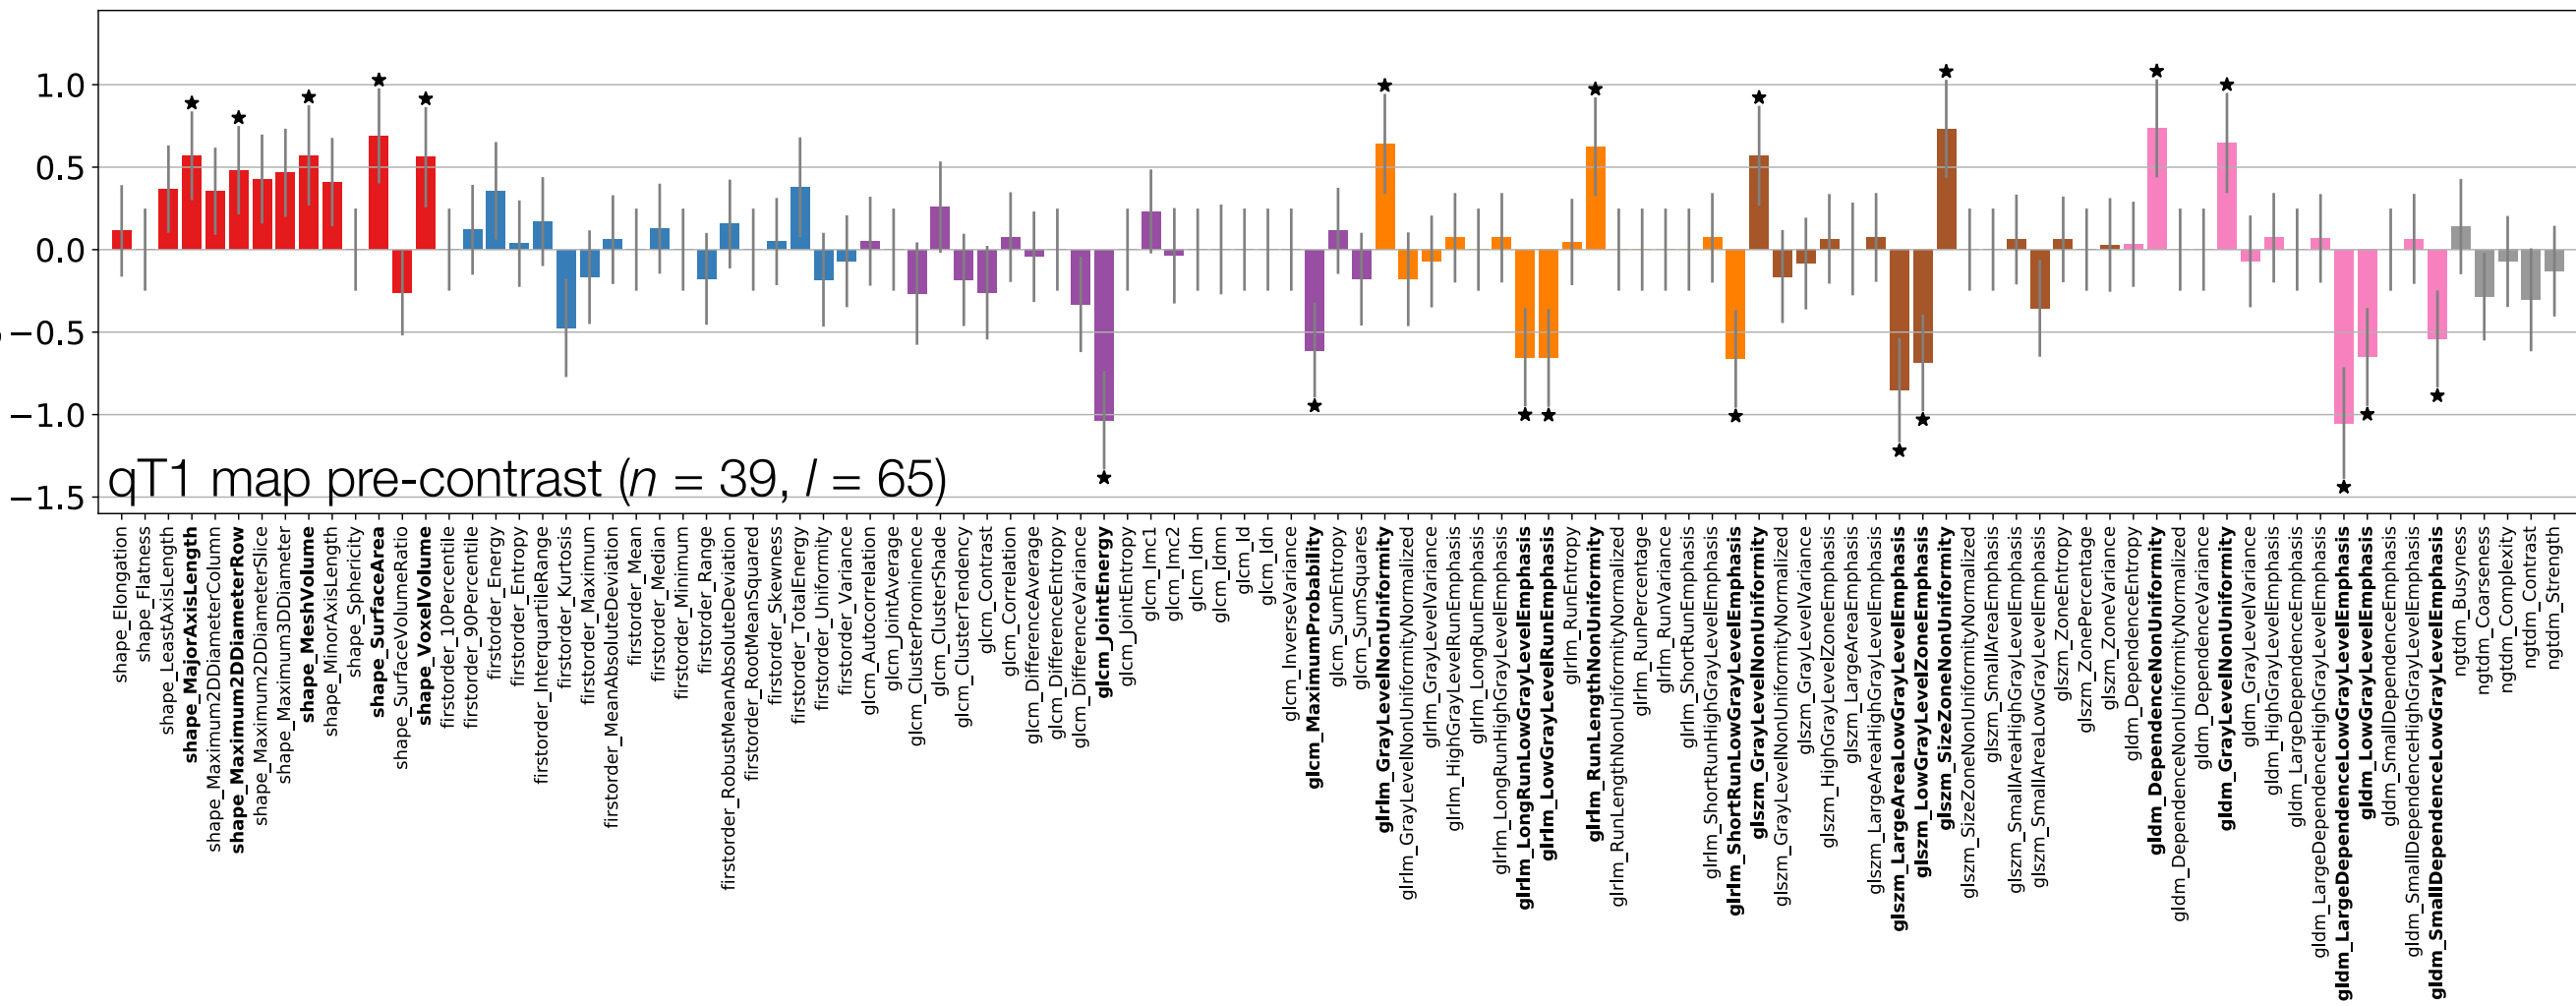

Supplement: s1 [file s1]

**(a)**

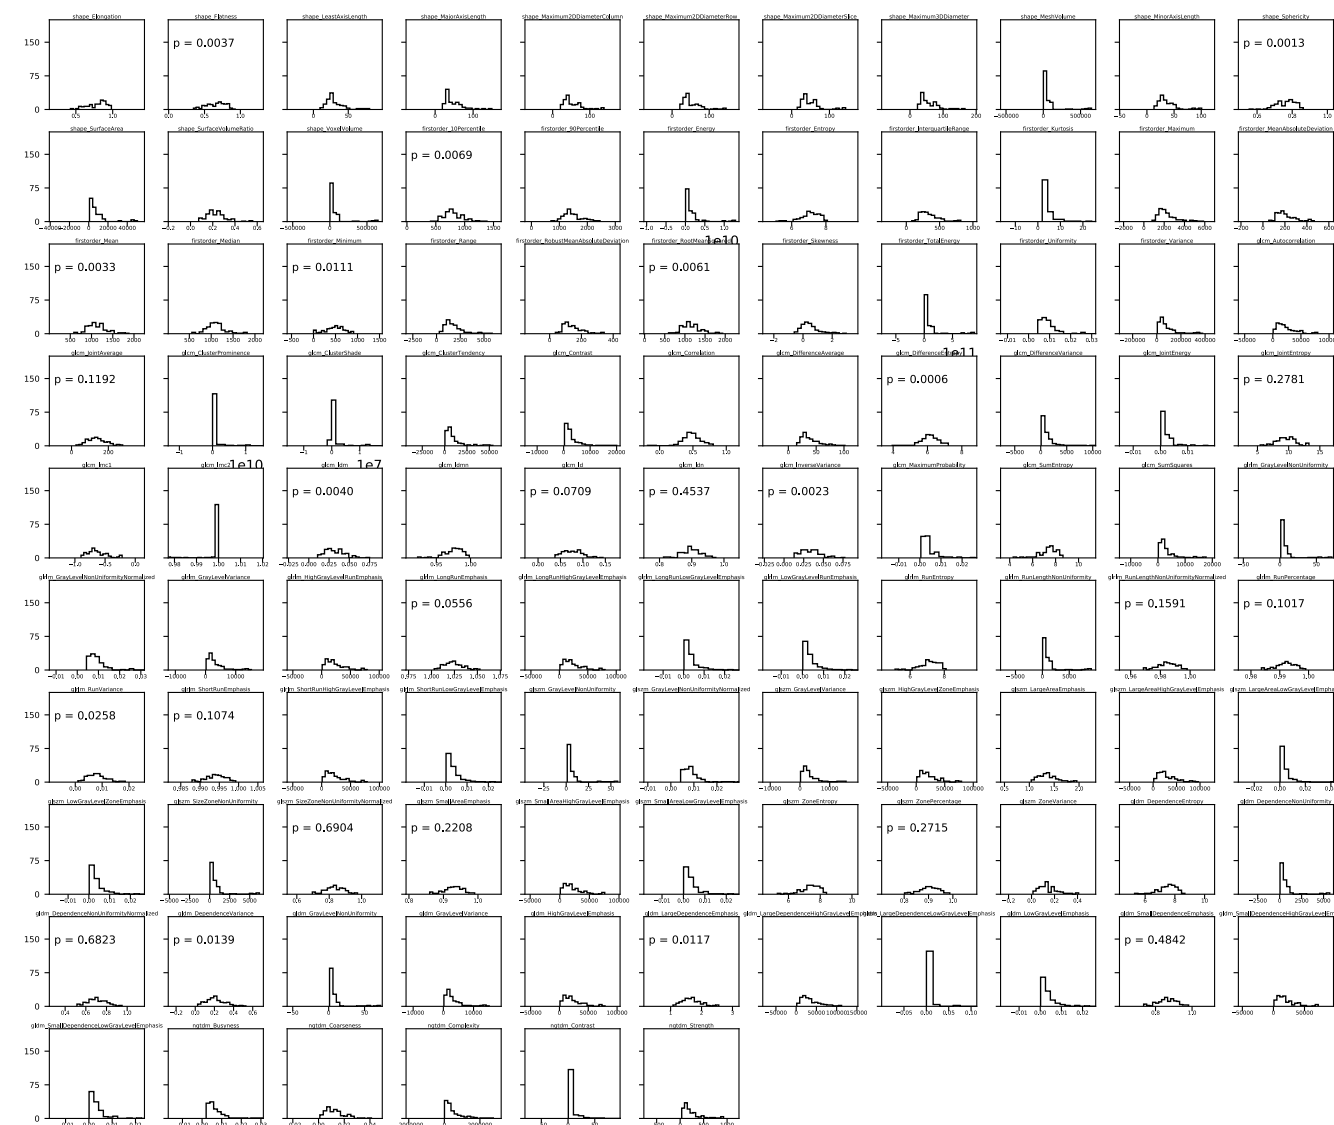

**(b)**

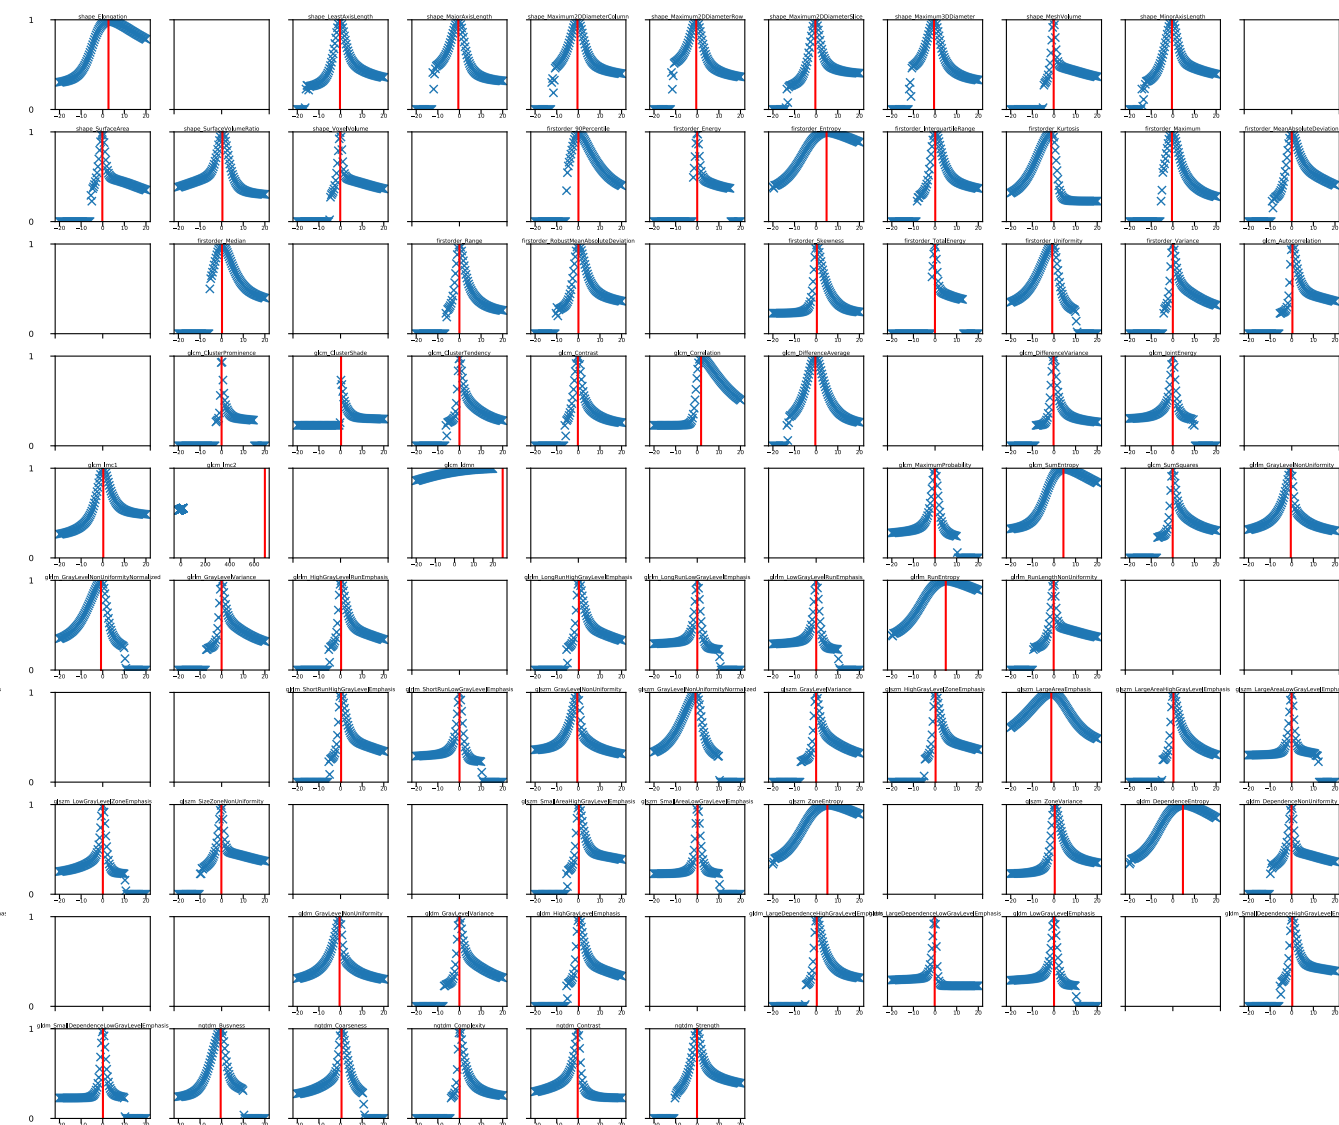

**(c)**

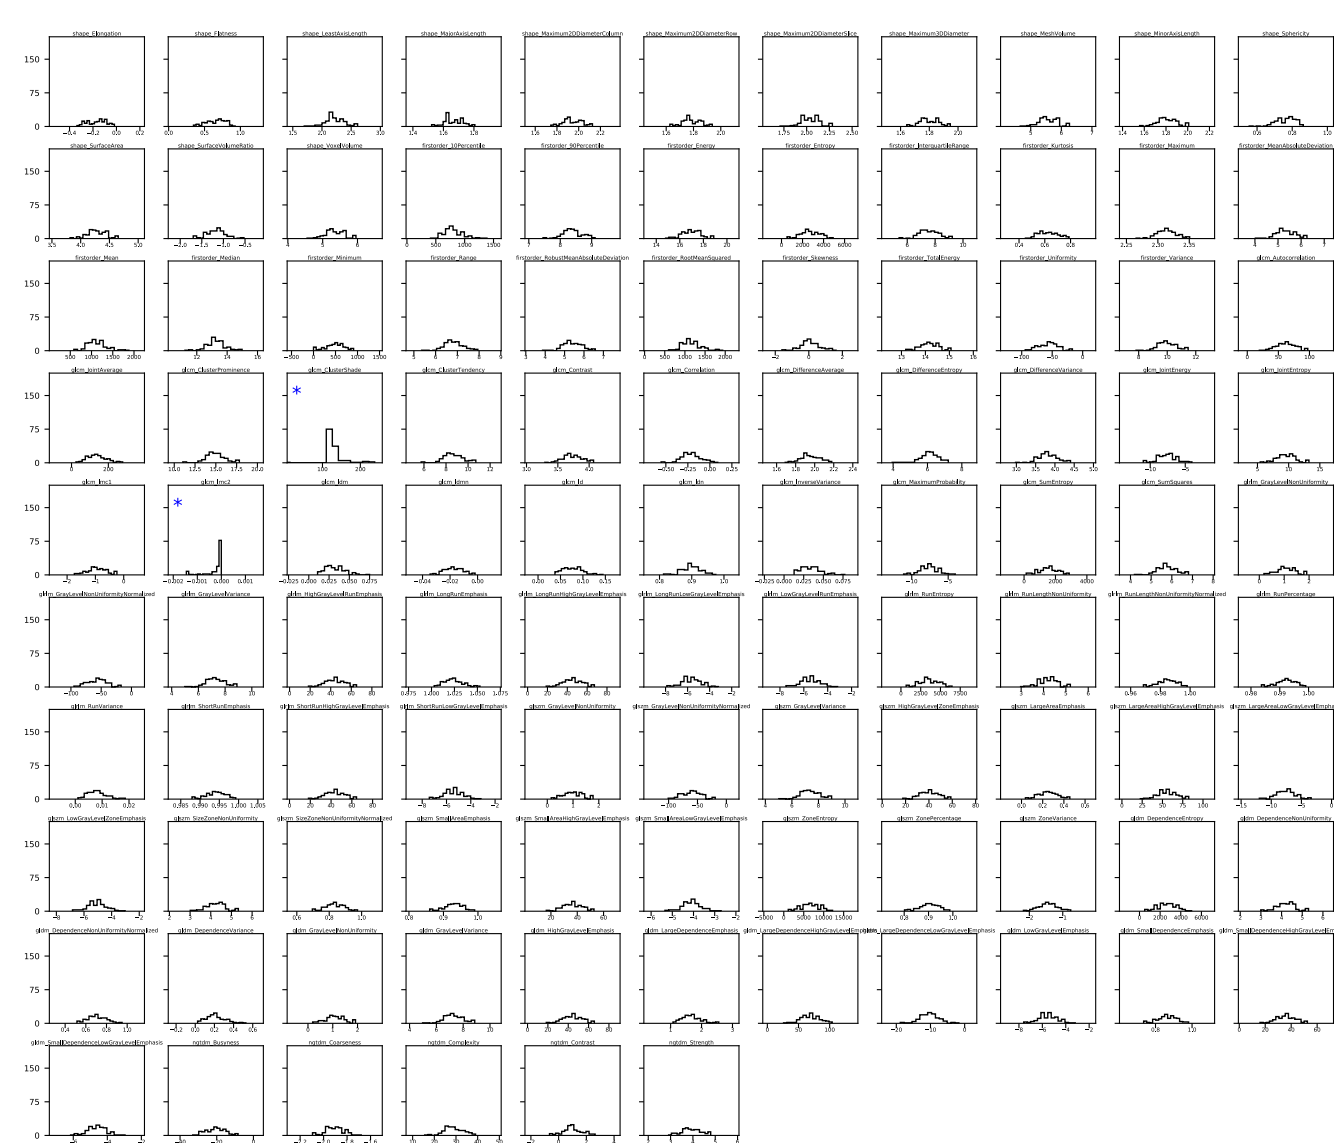

**(d)**

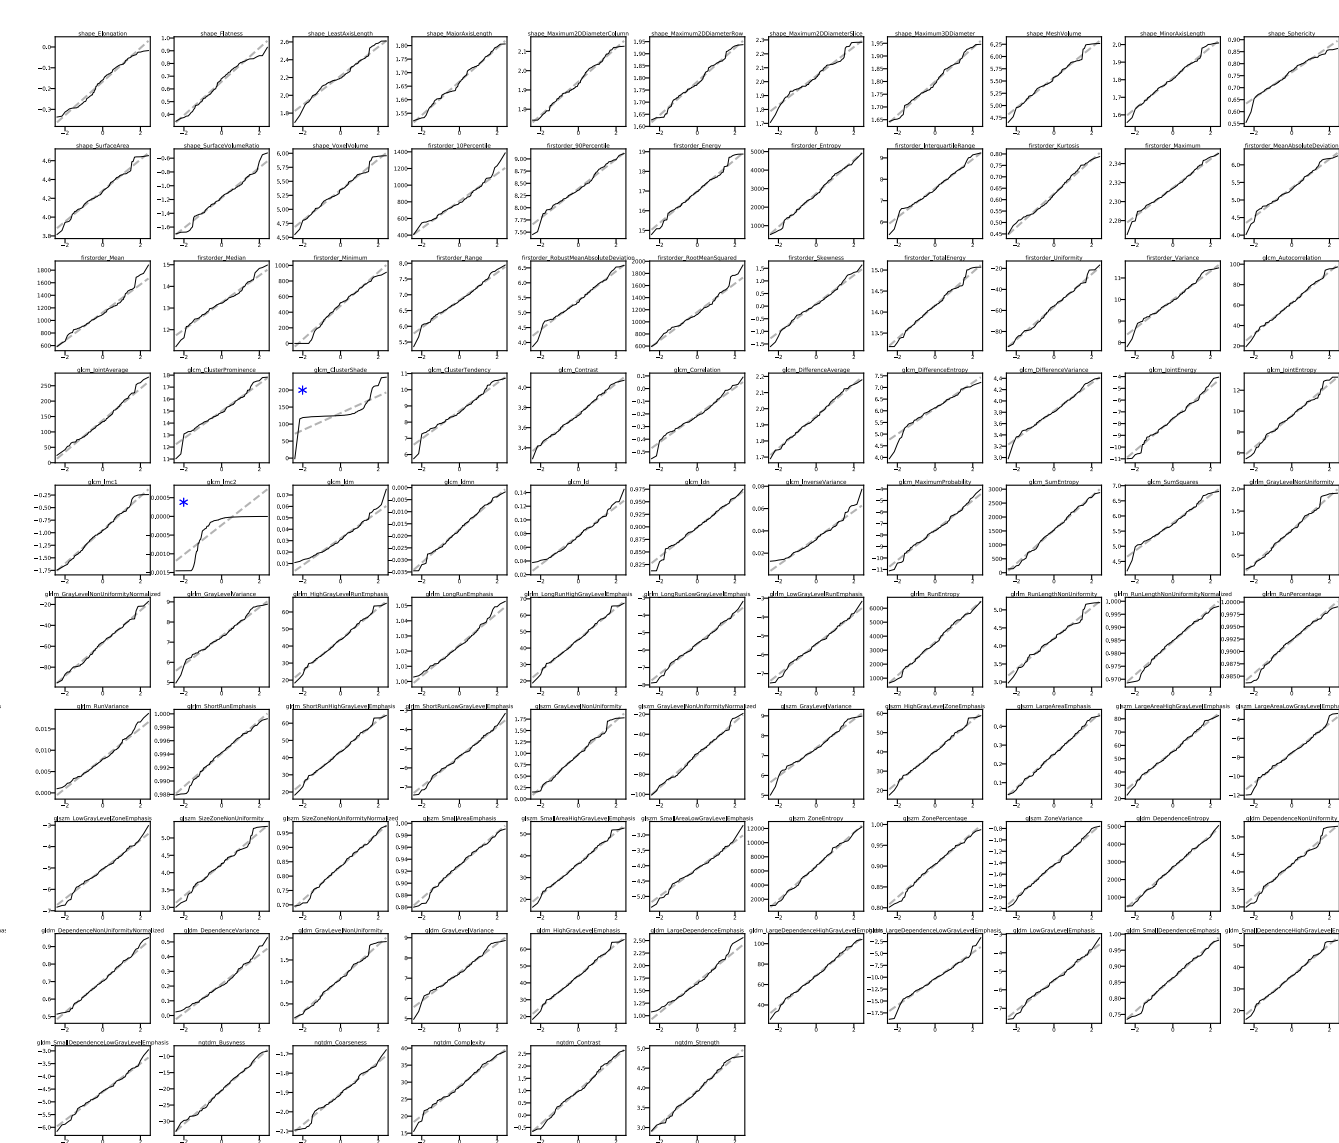

Supplement: s1 [file s1]

(a)

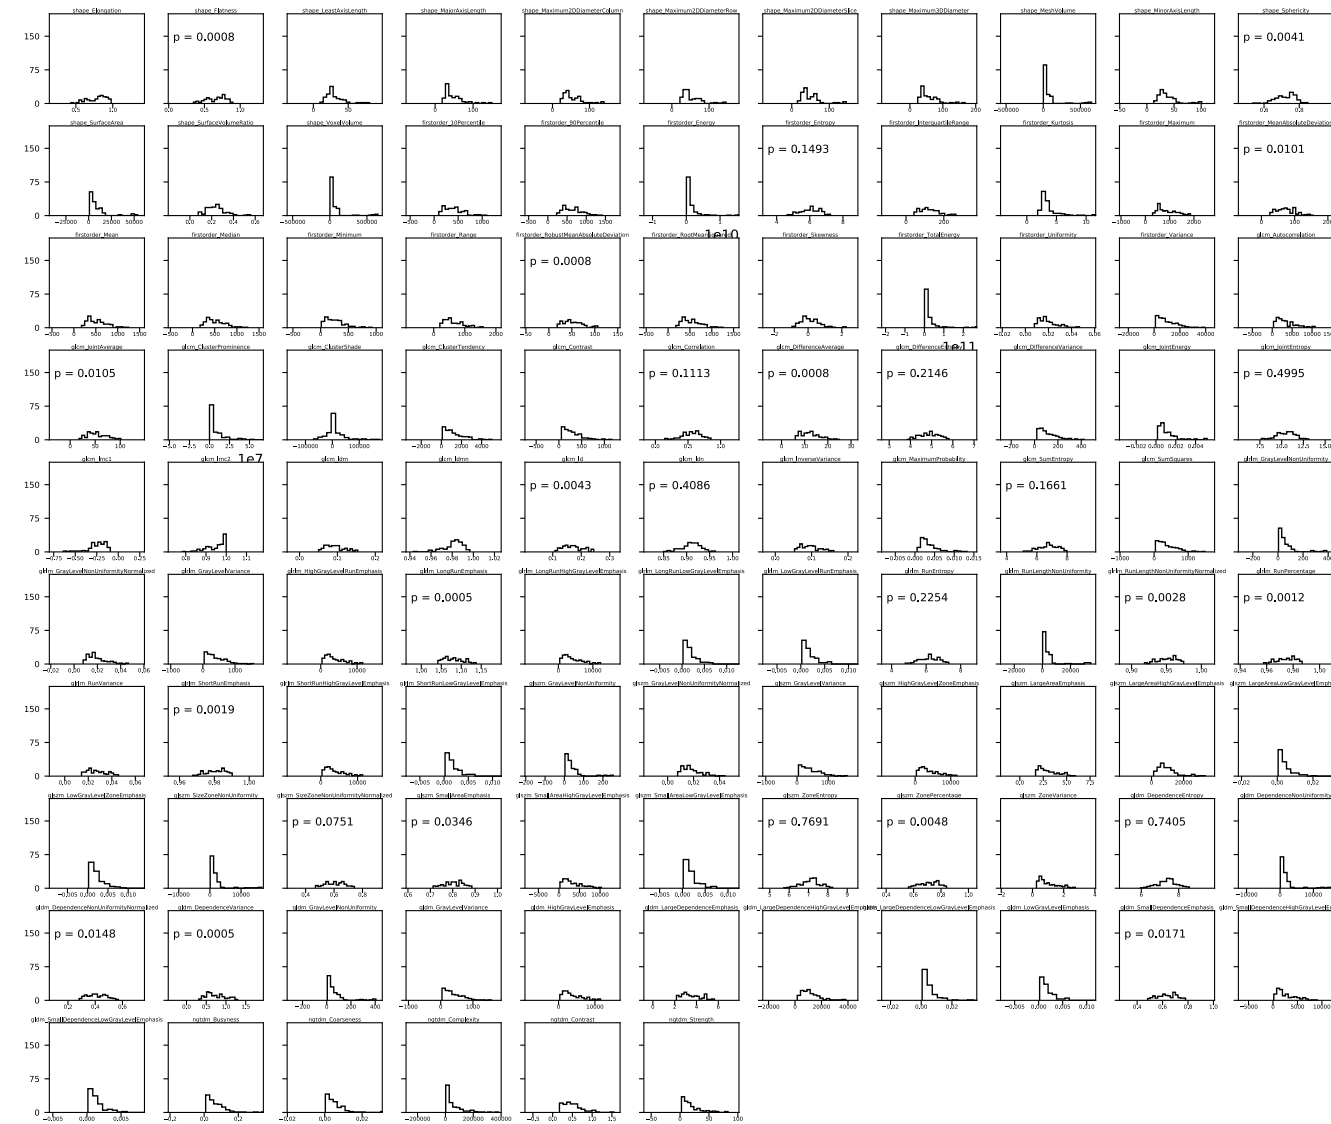

(b)

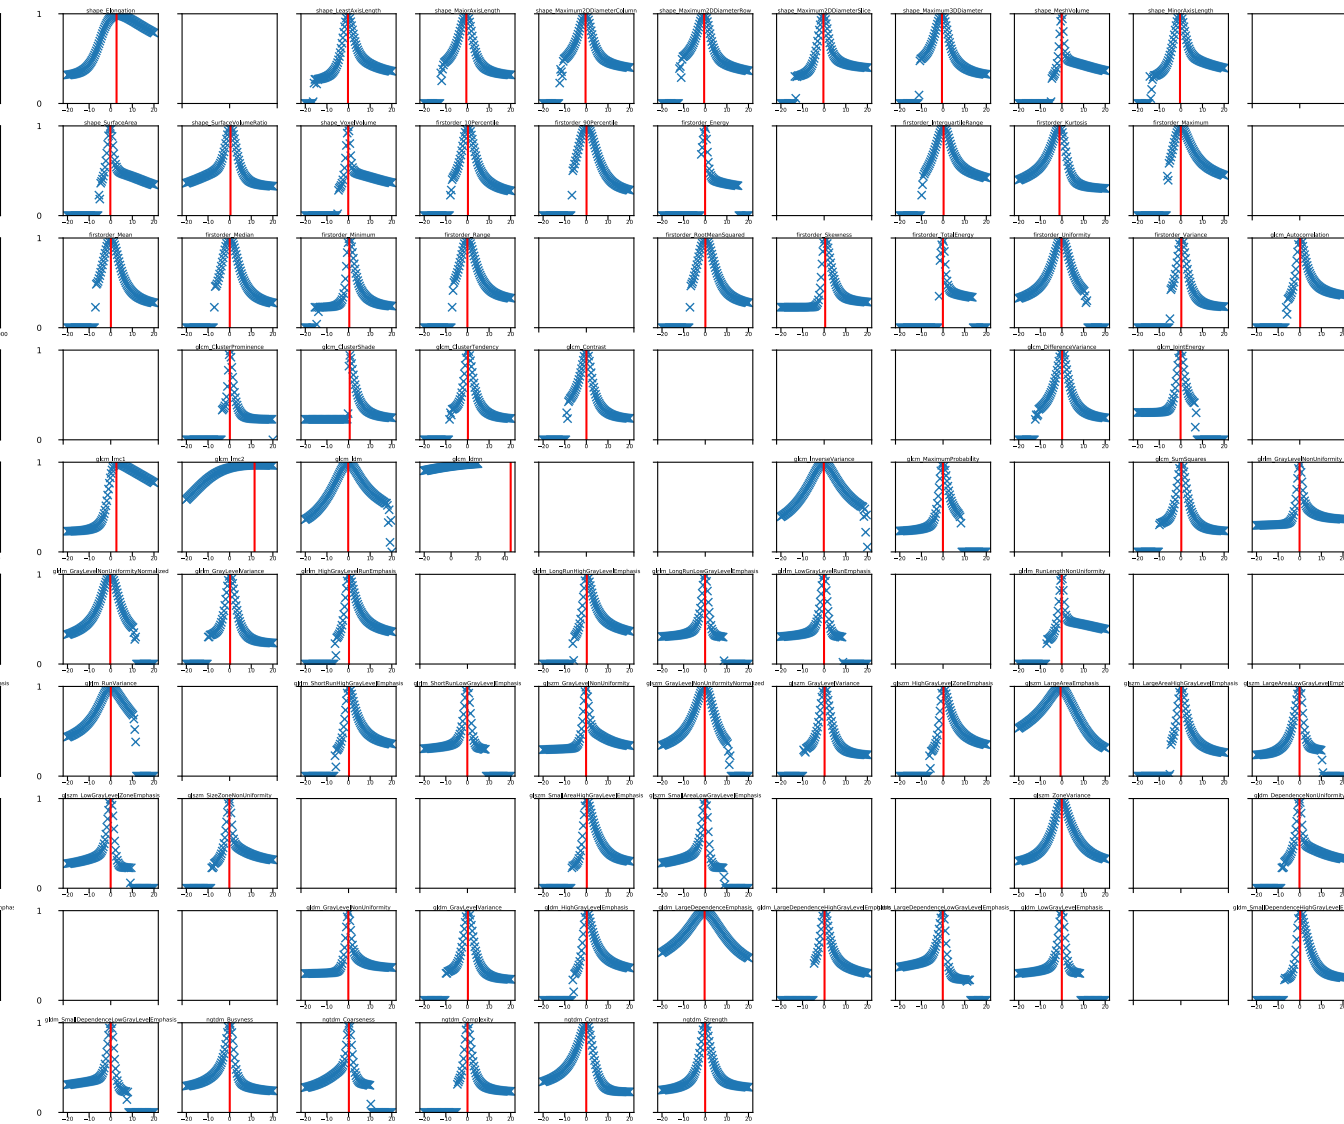

(c)

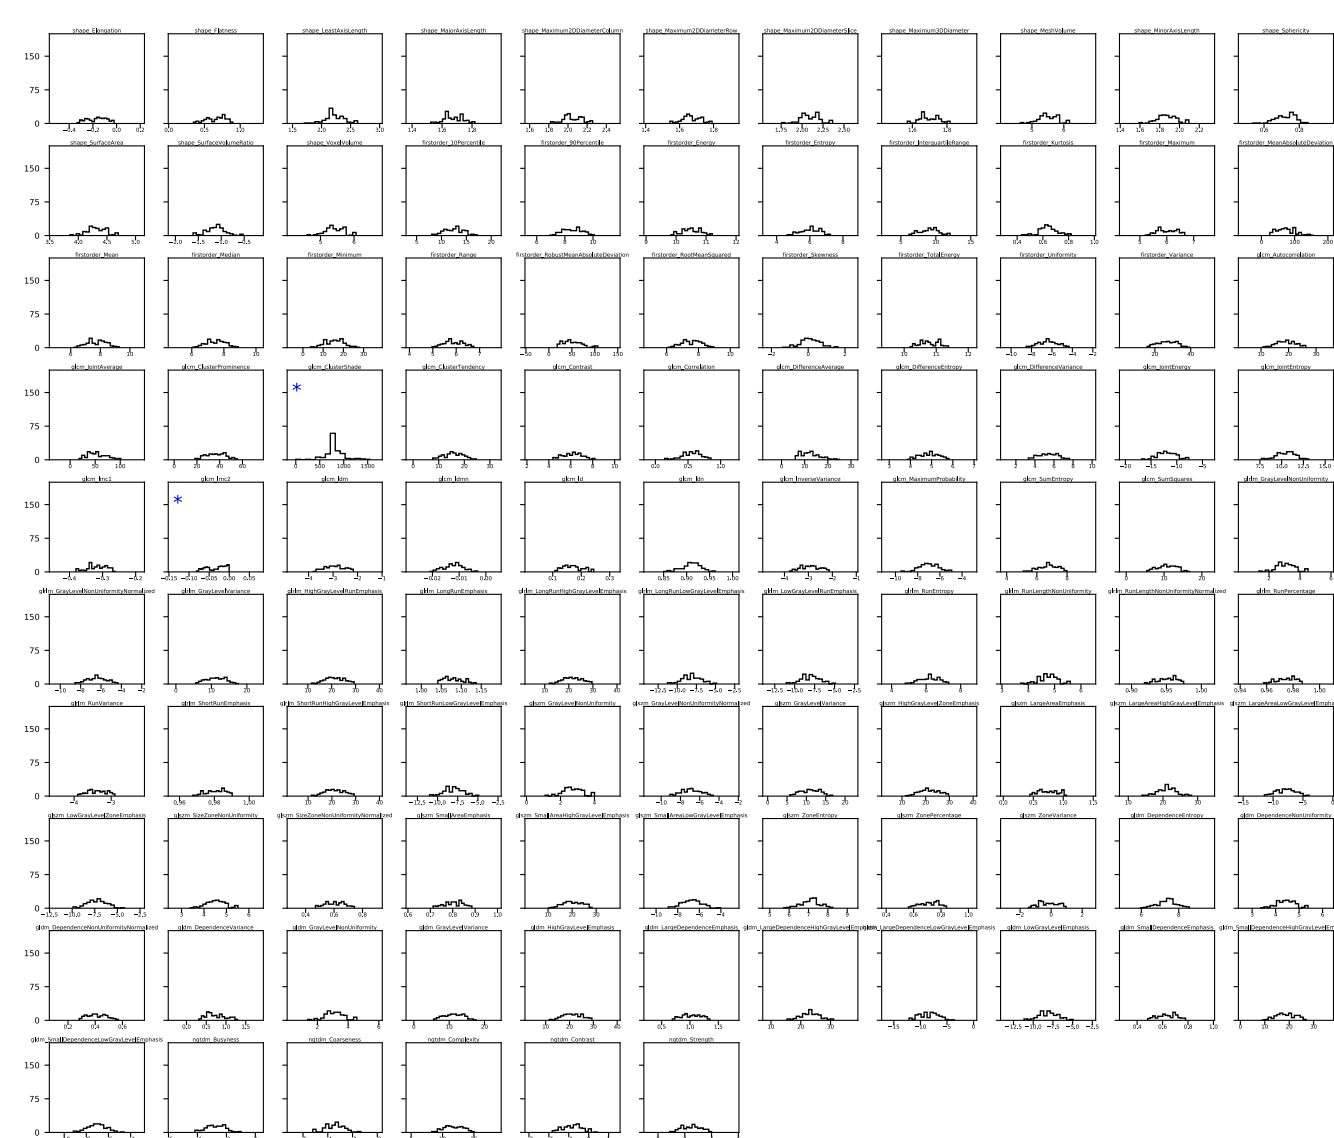

(d)

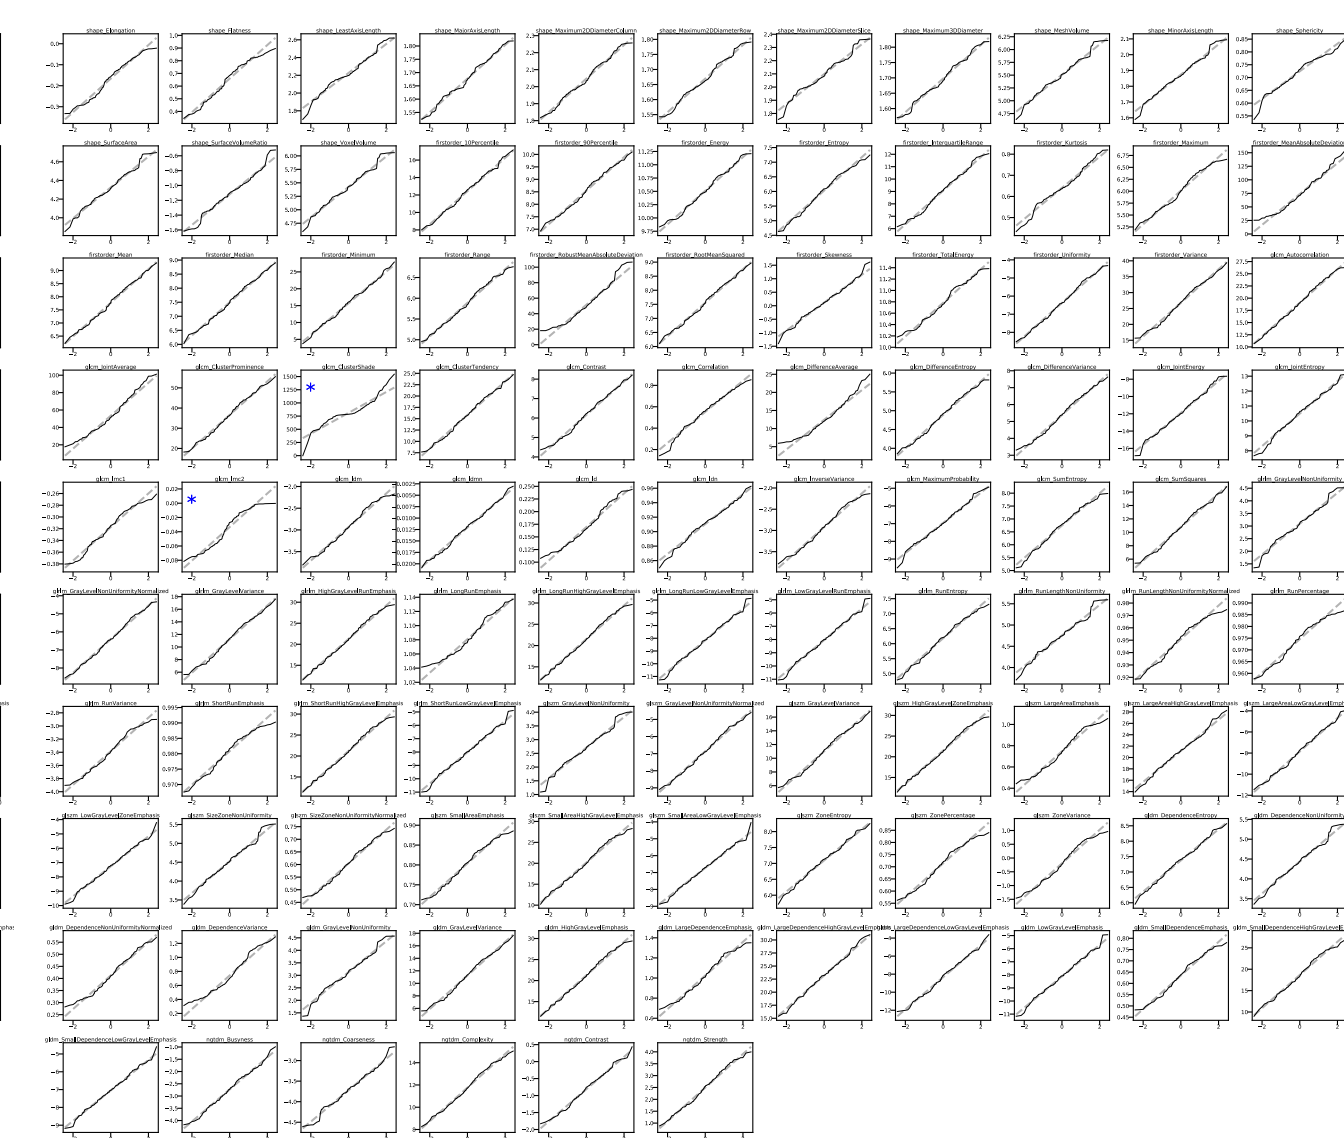

Supplement: s1 [file s1]

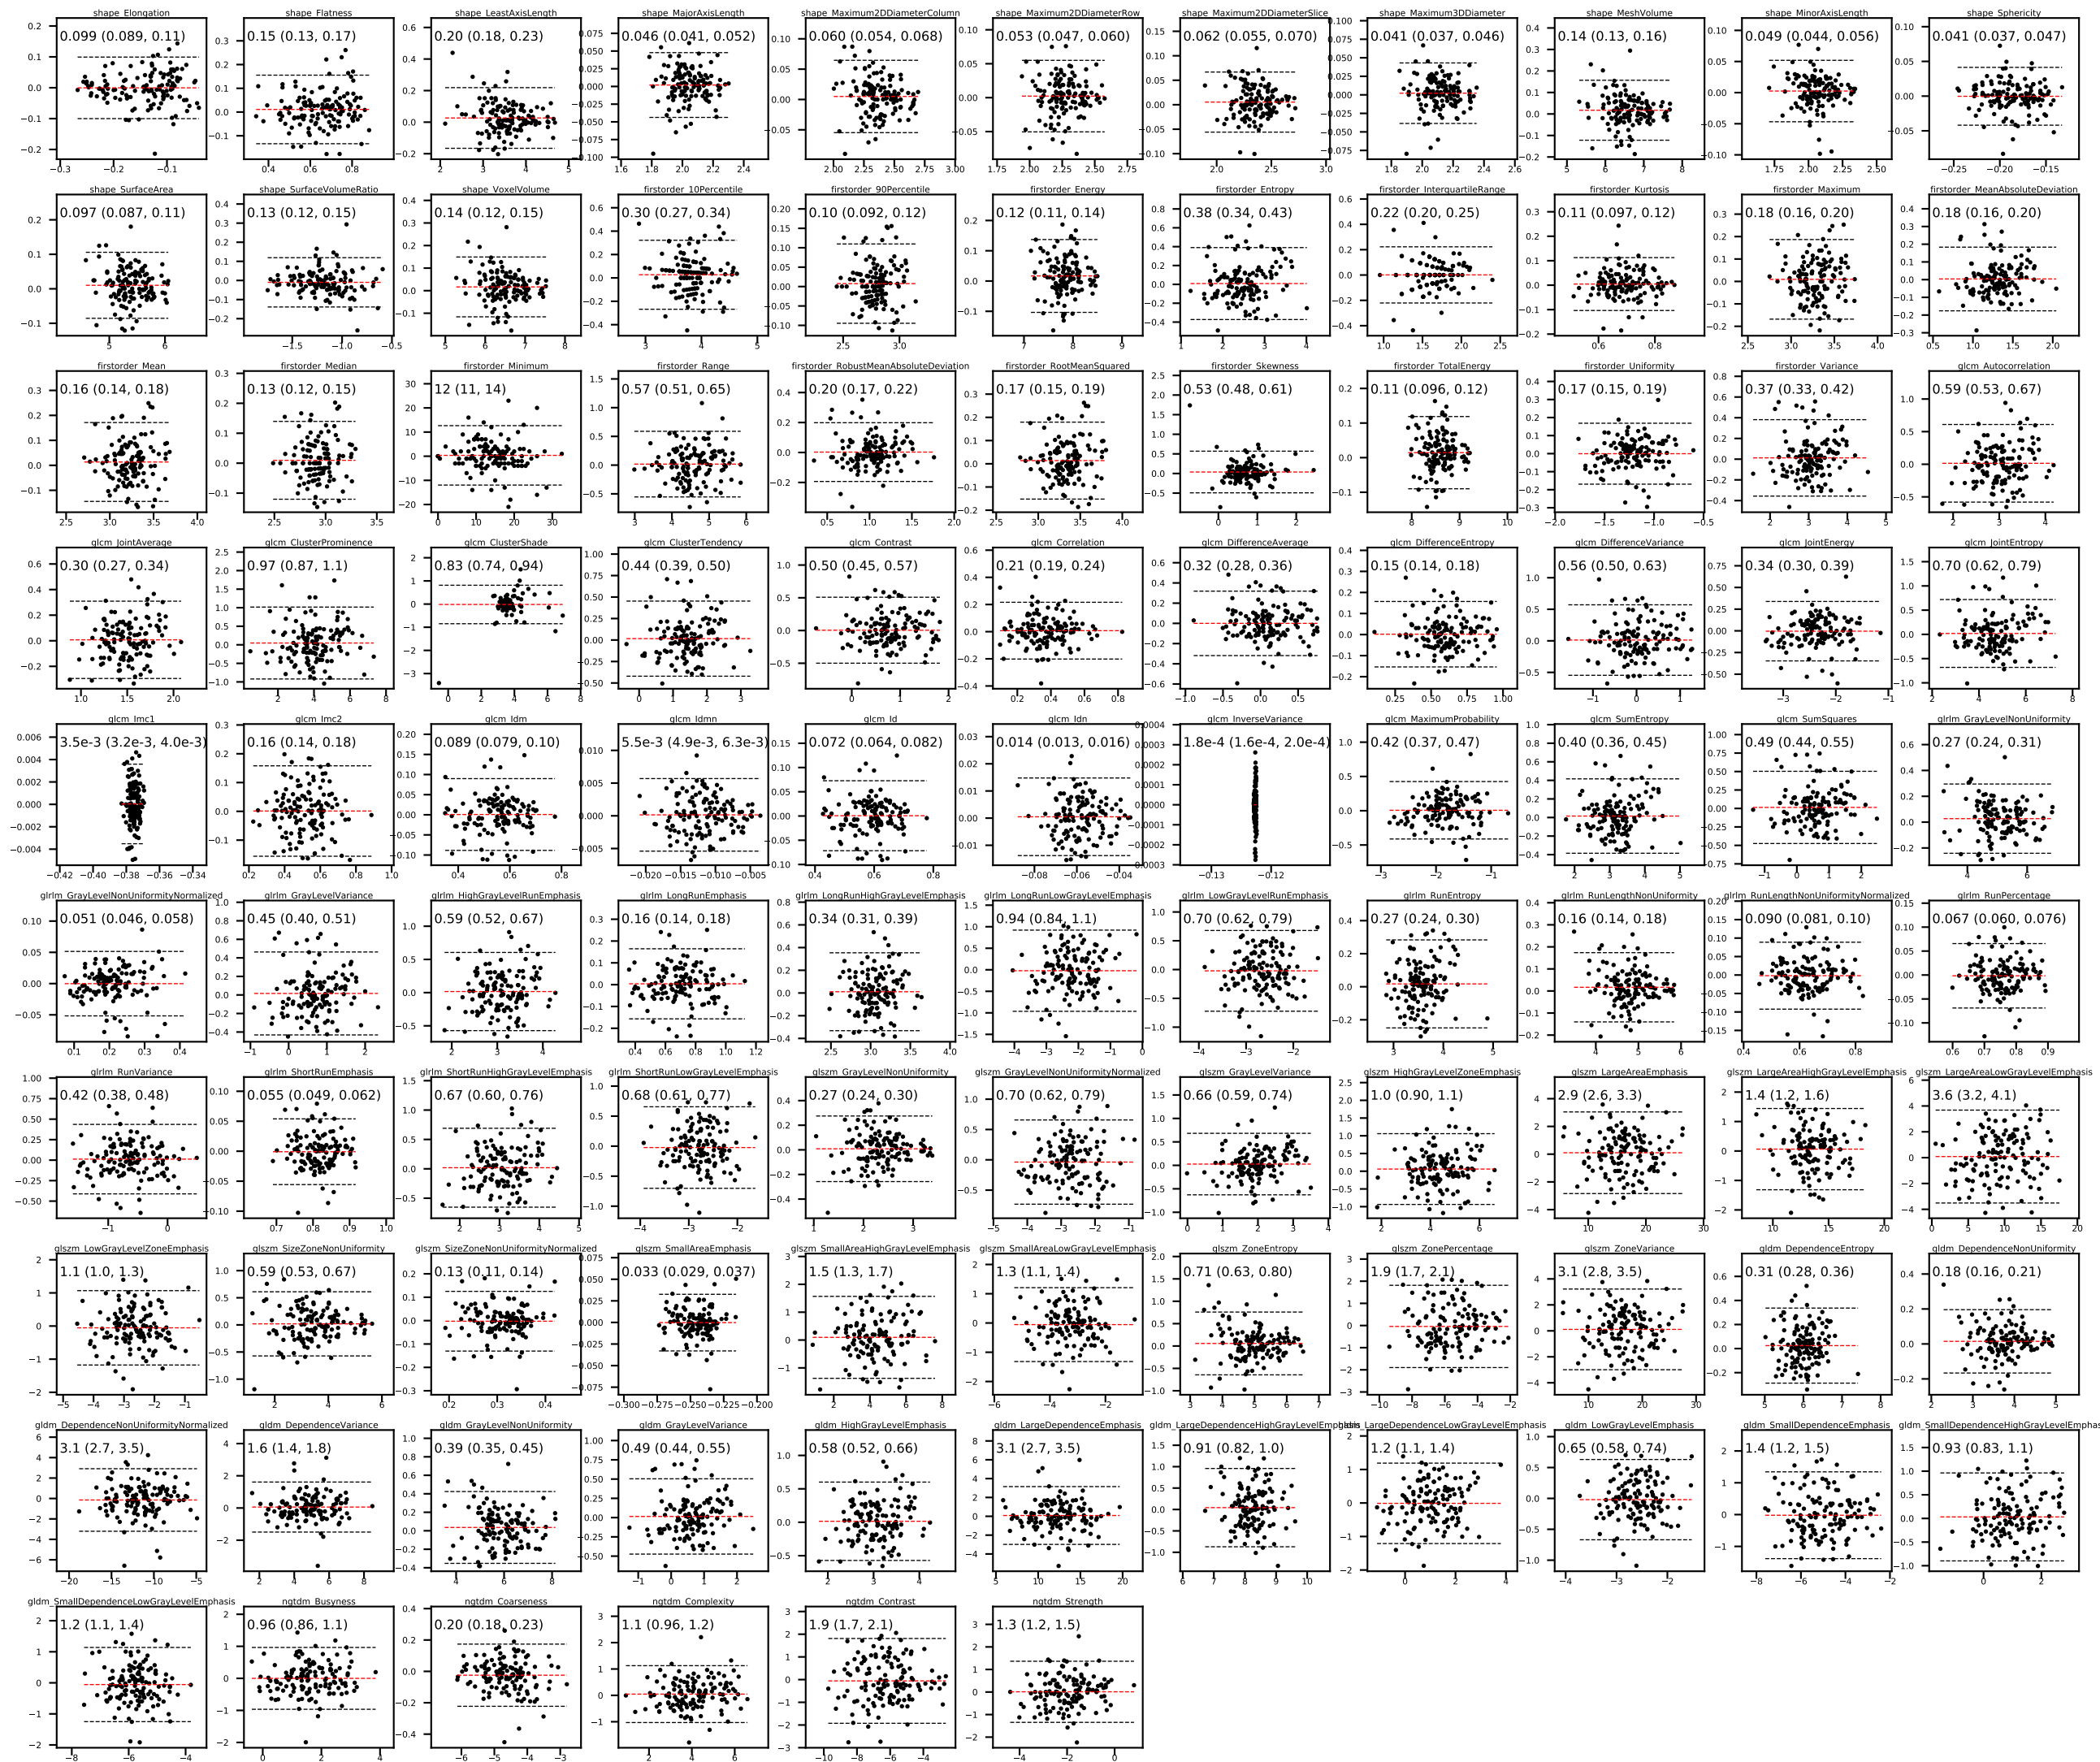

Supplement: s1 [file s1]

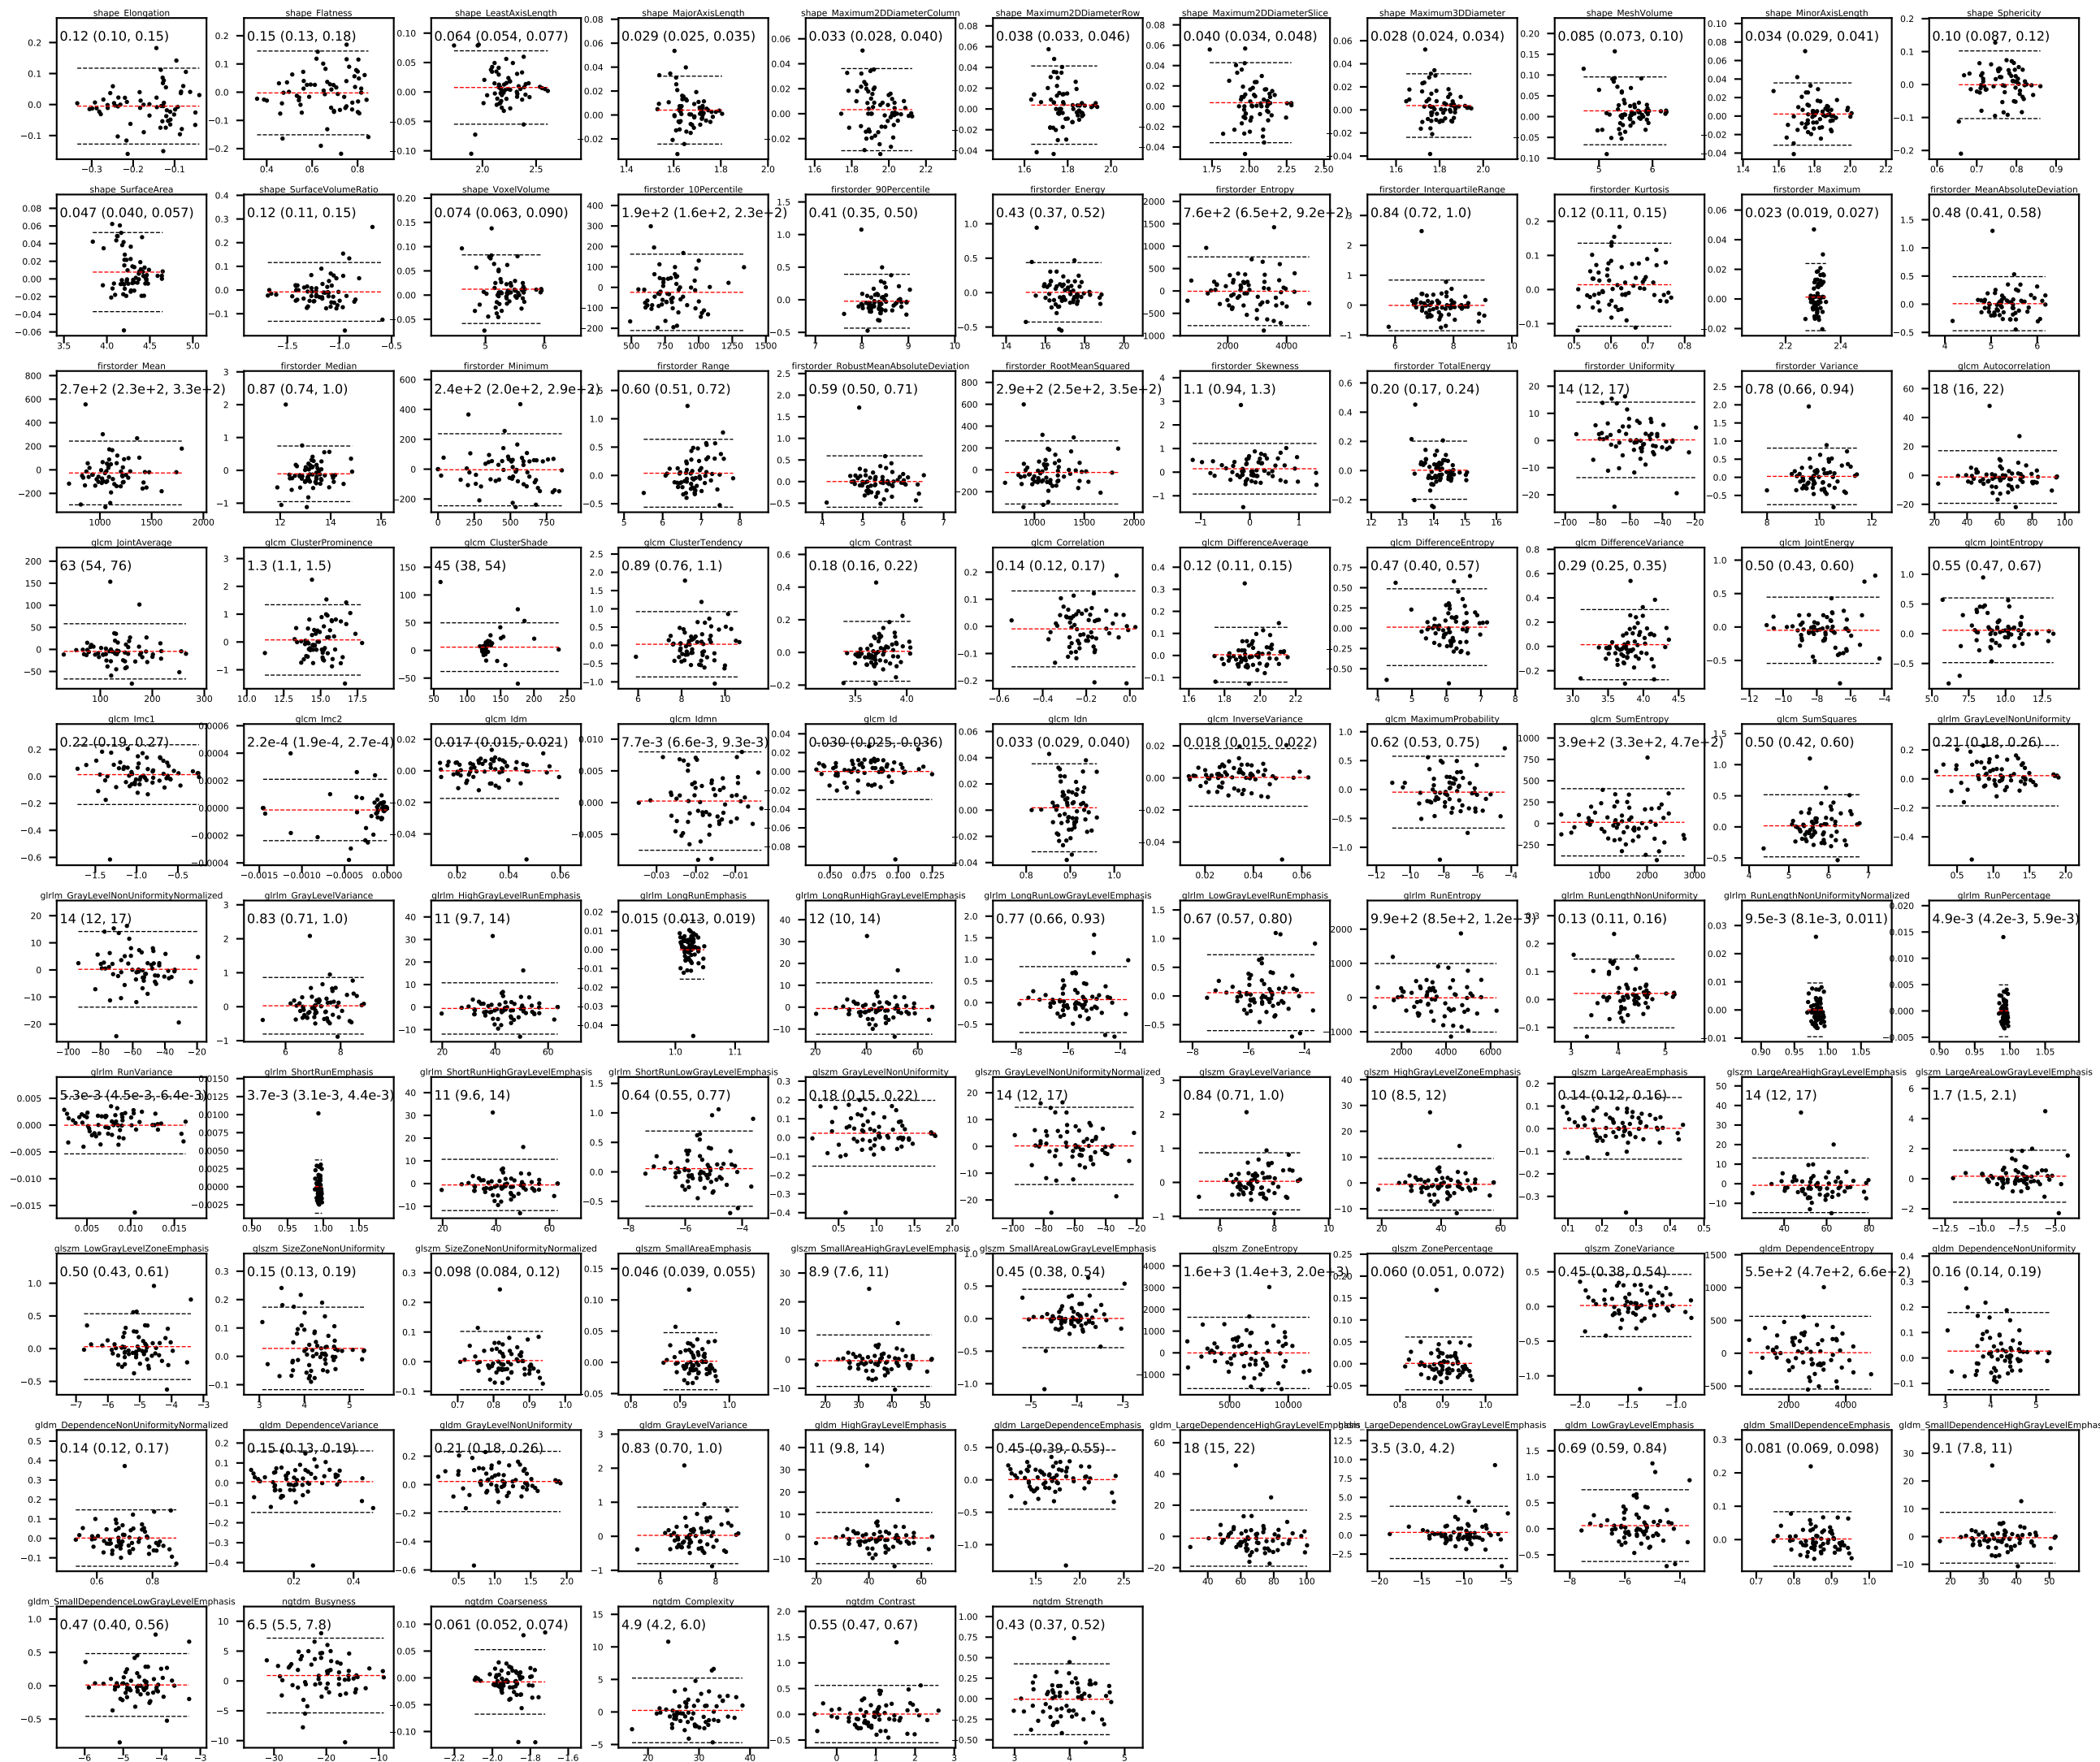

Supplement: s1 [file s1]

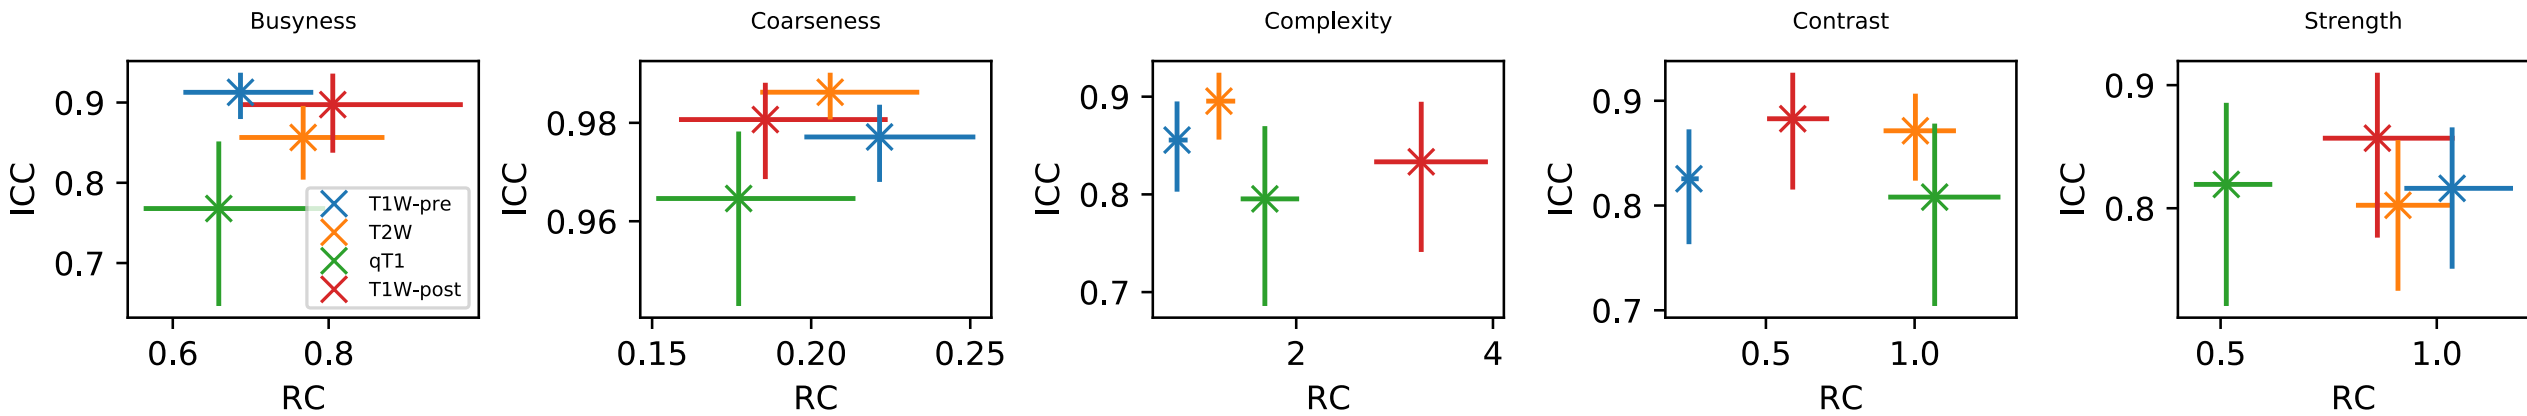

Supplement: s1 [file s1]

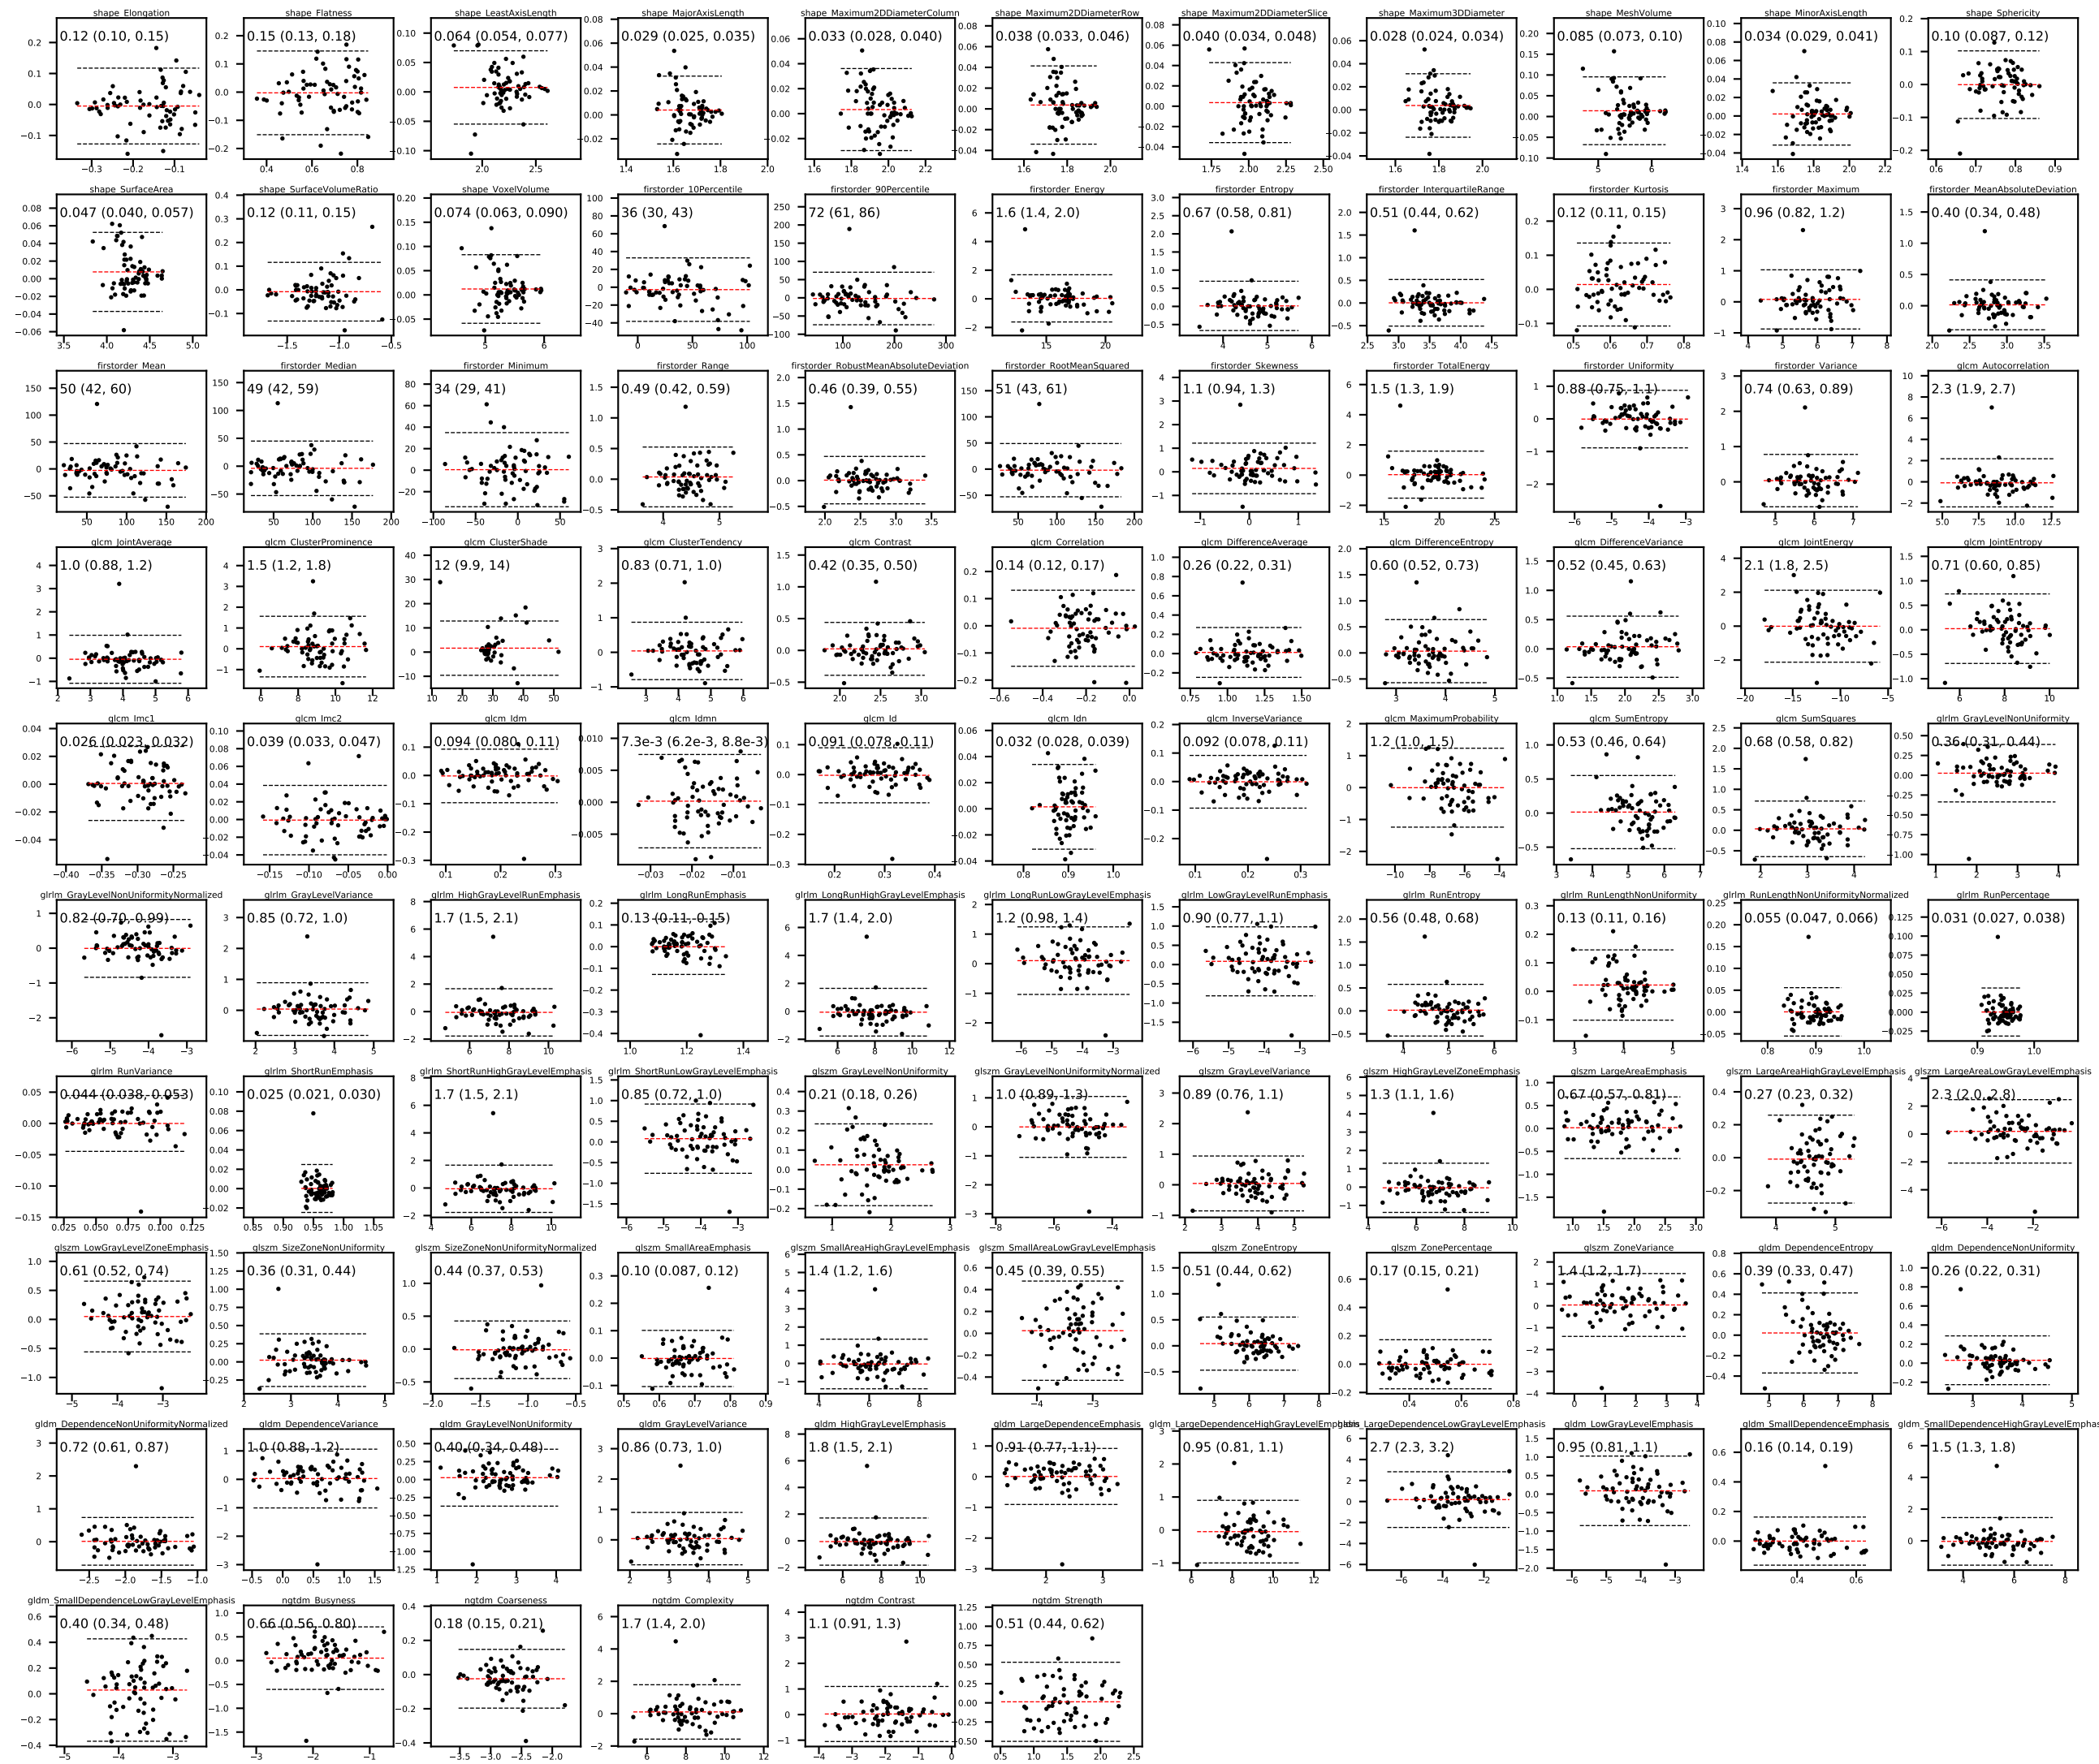

Supplement: s1 [file s1]

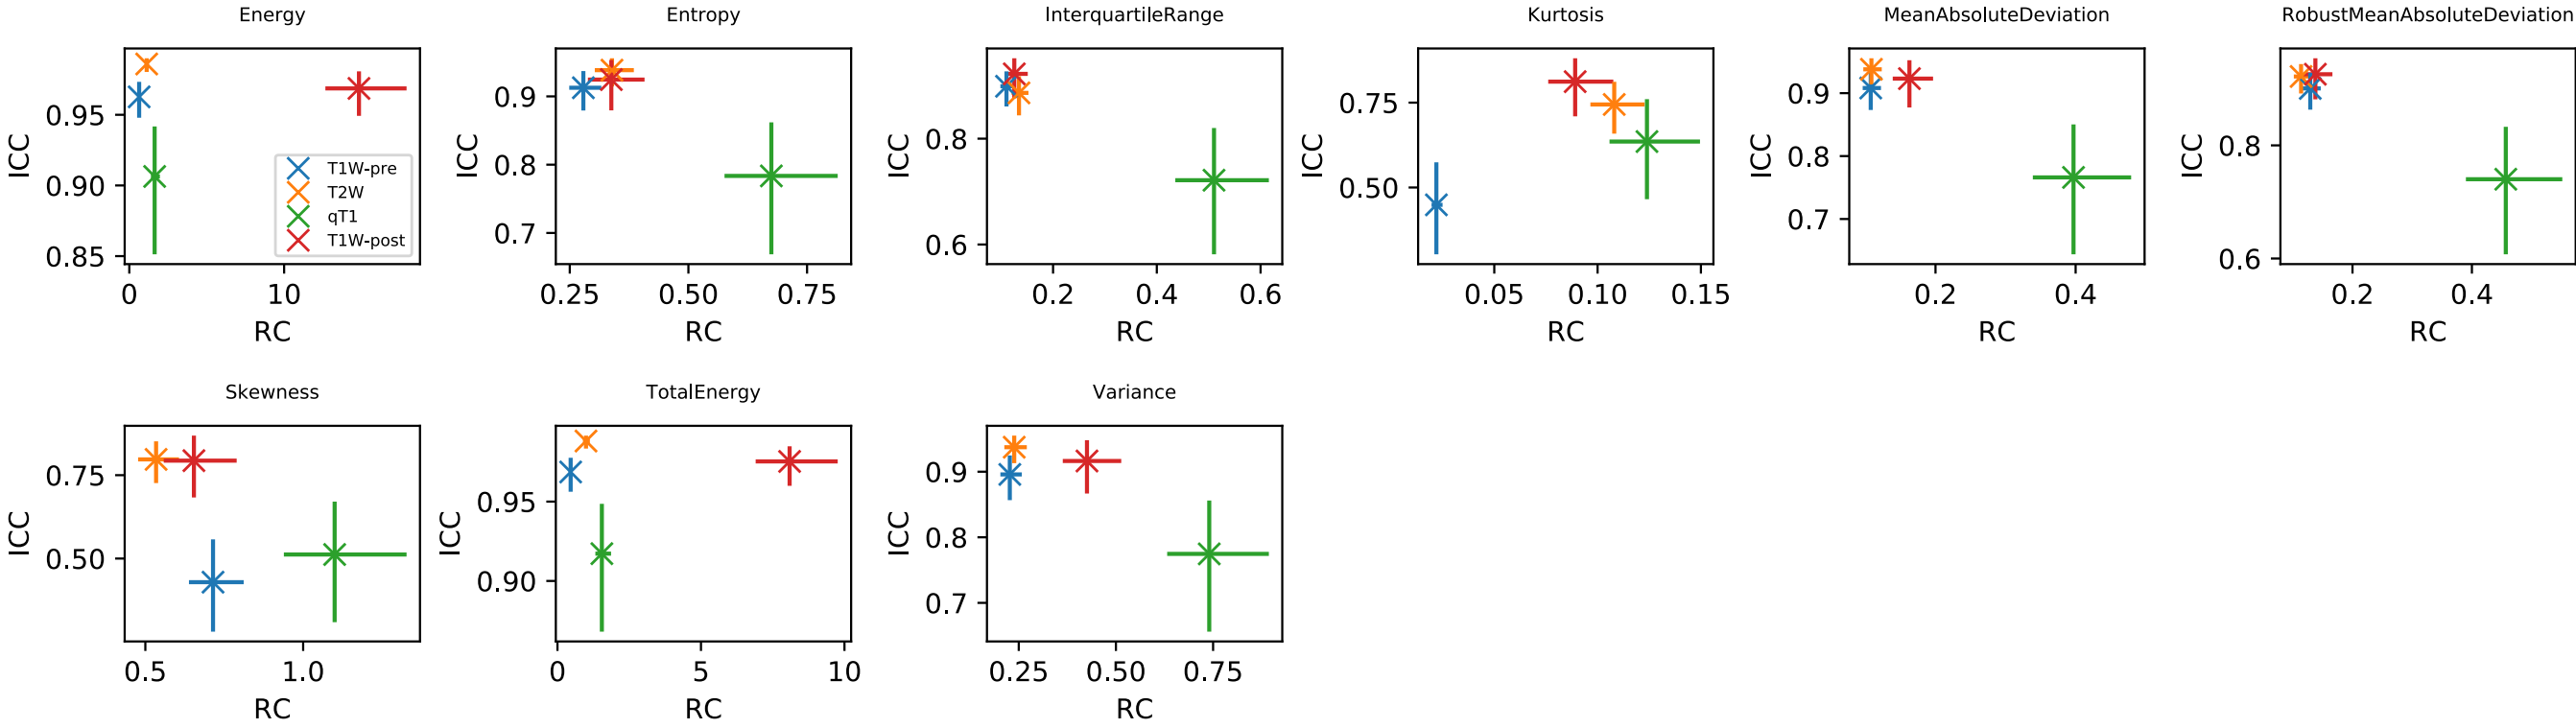

Supplement: s1 [file s1]

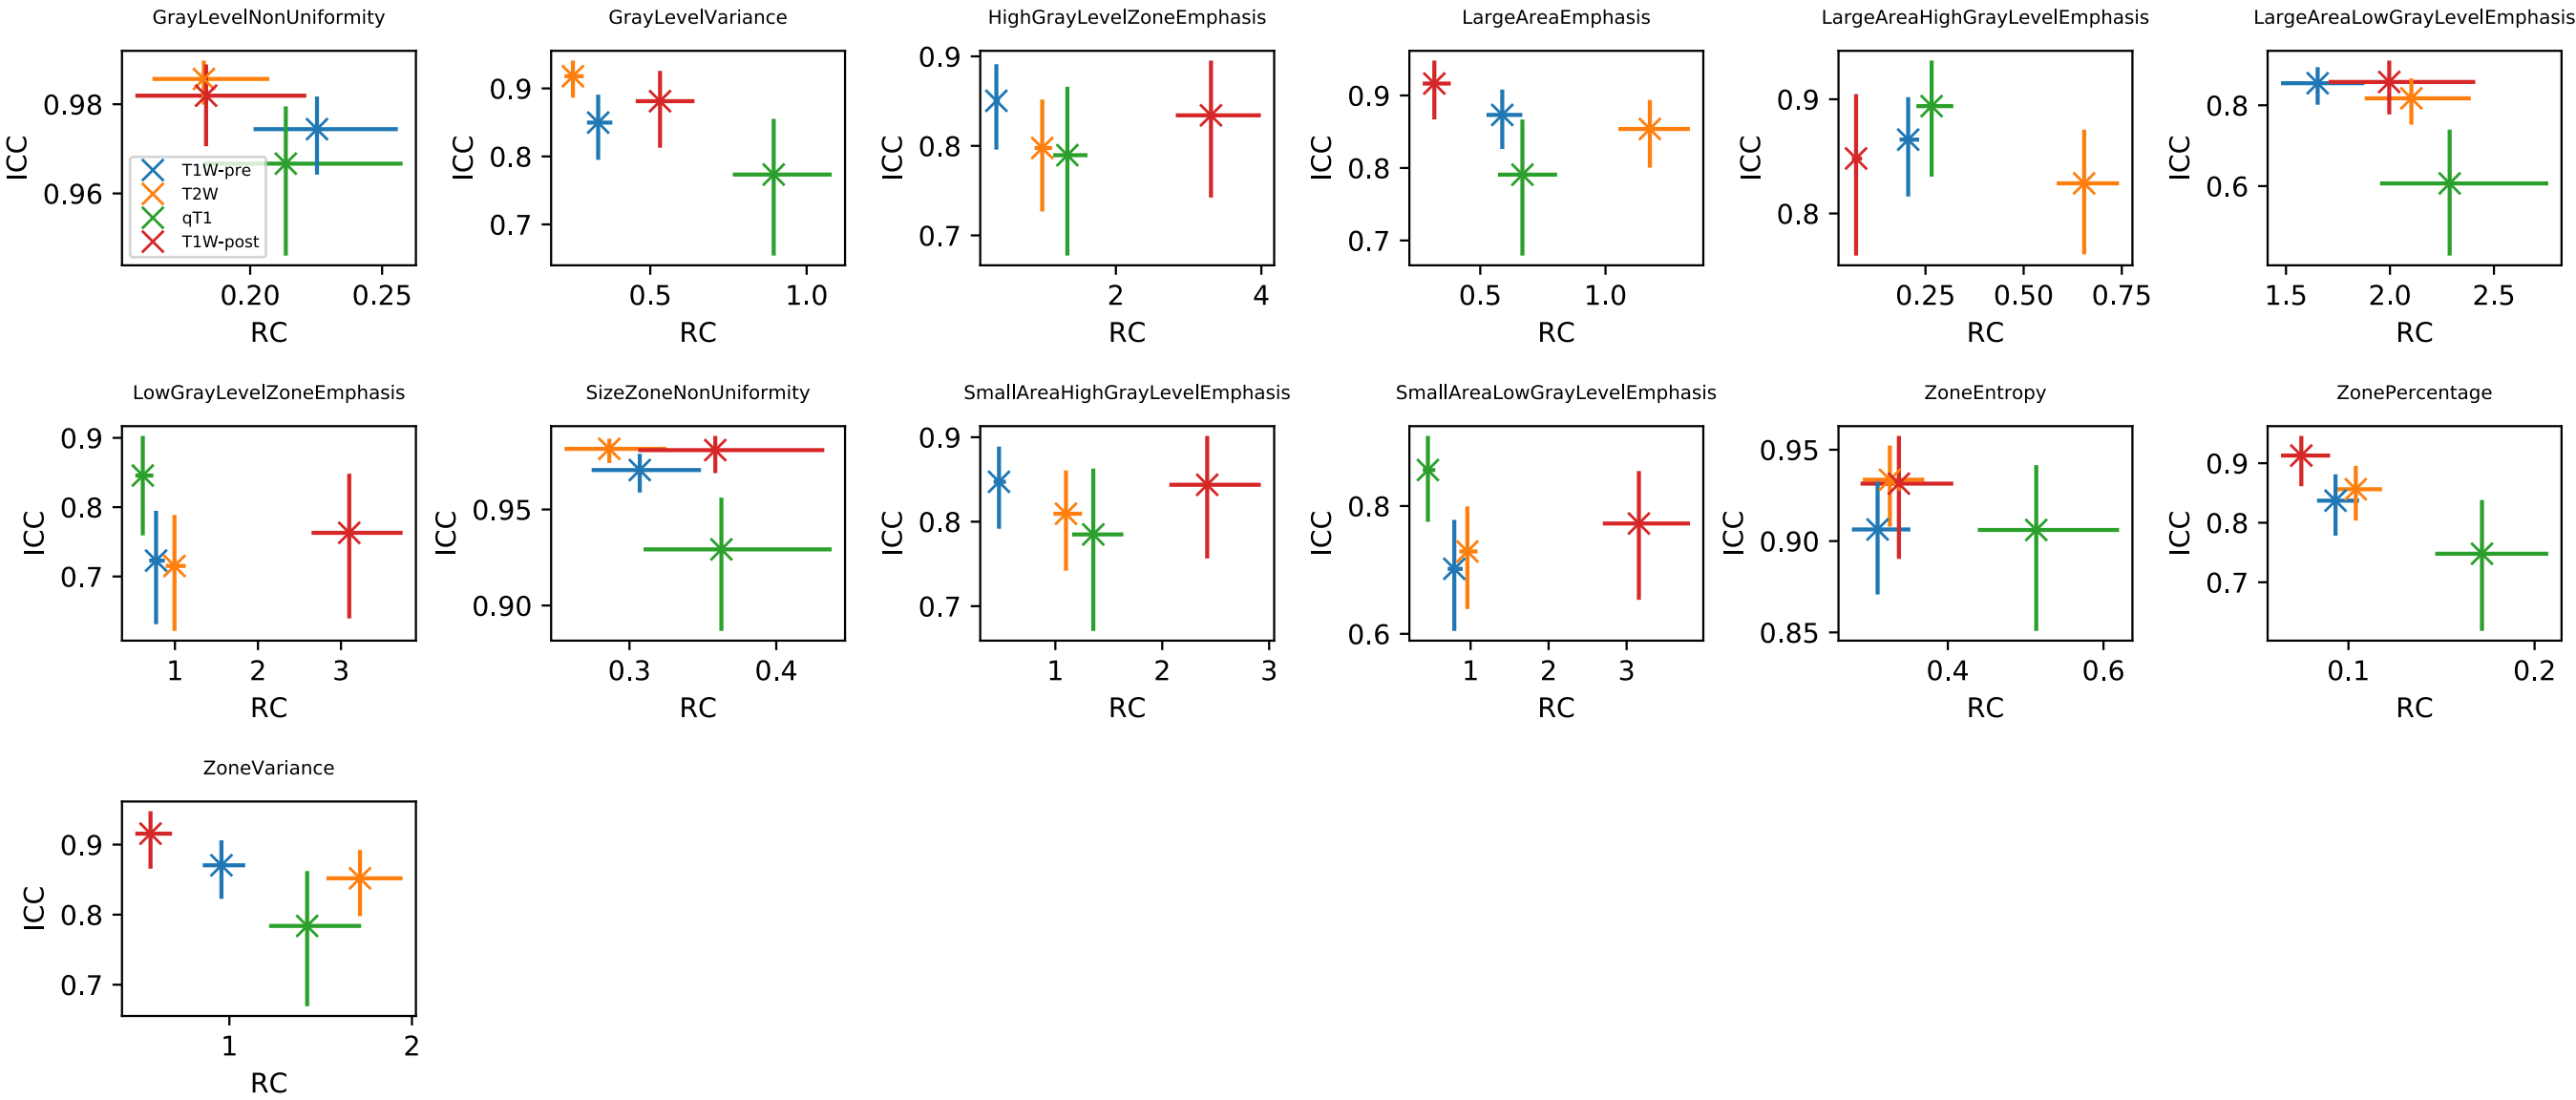

Supplement: s1 [file s1]

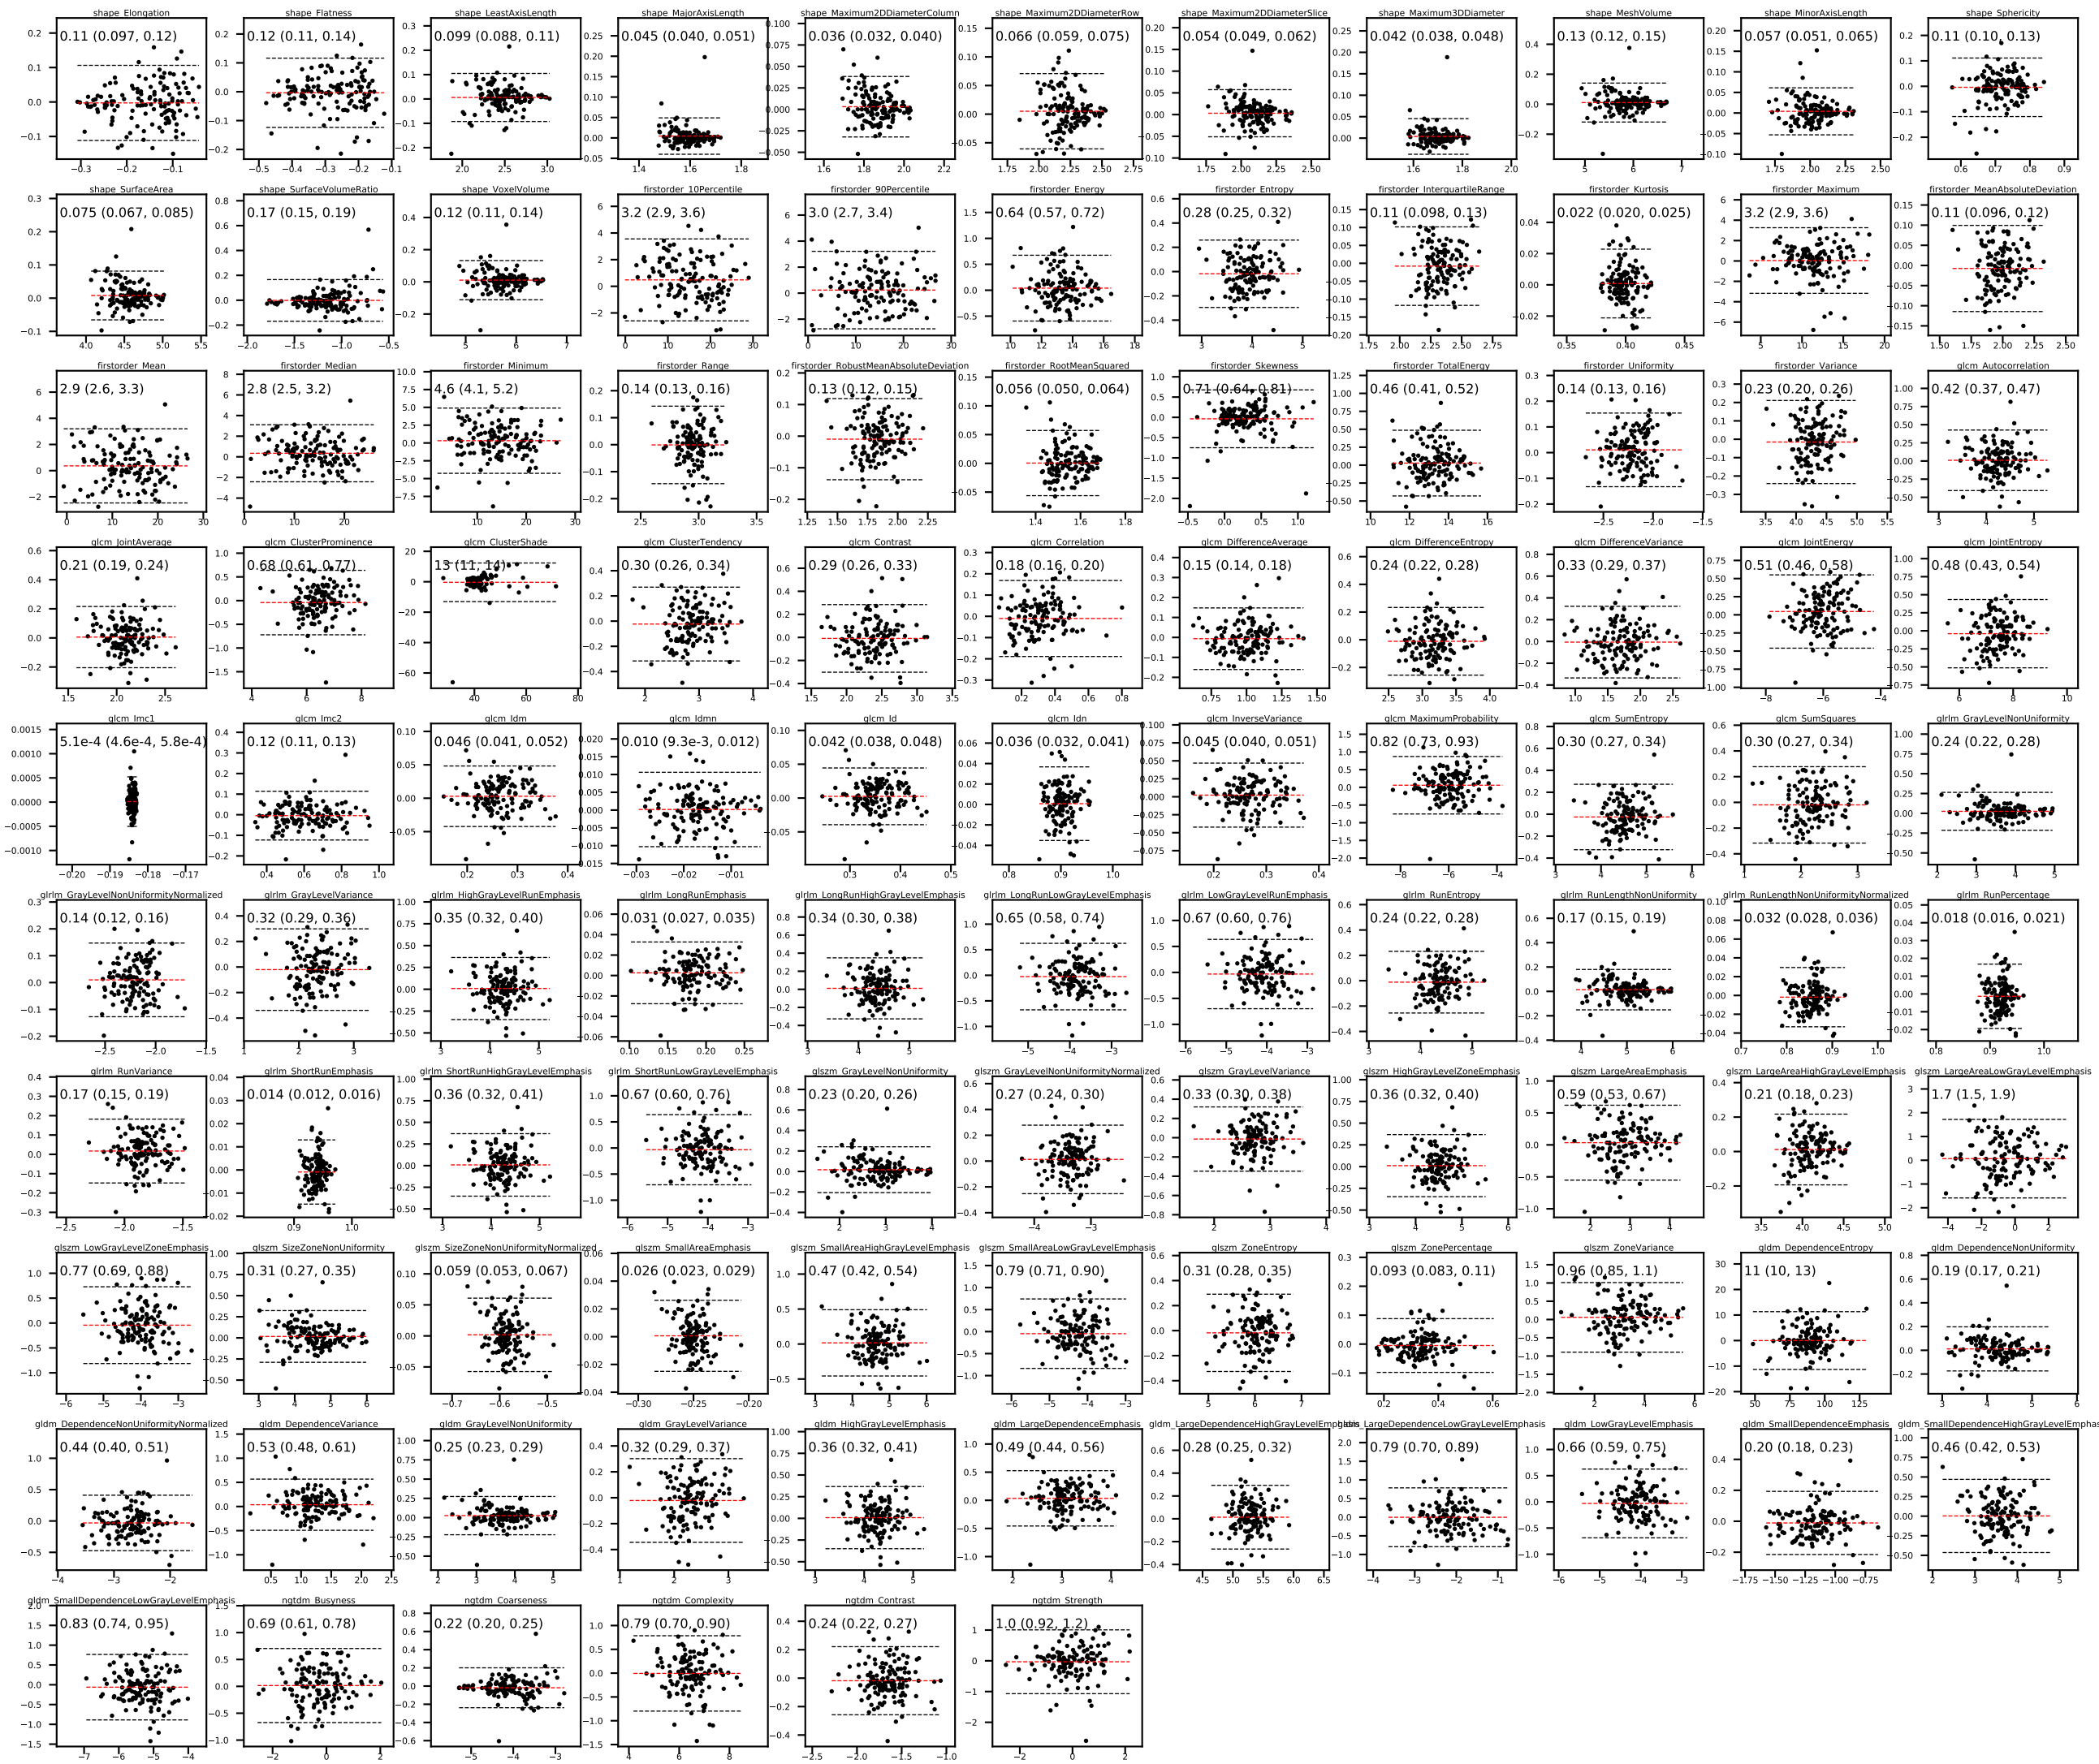

Supplement: s1 [file s1]

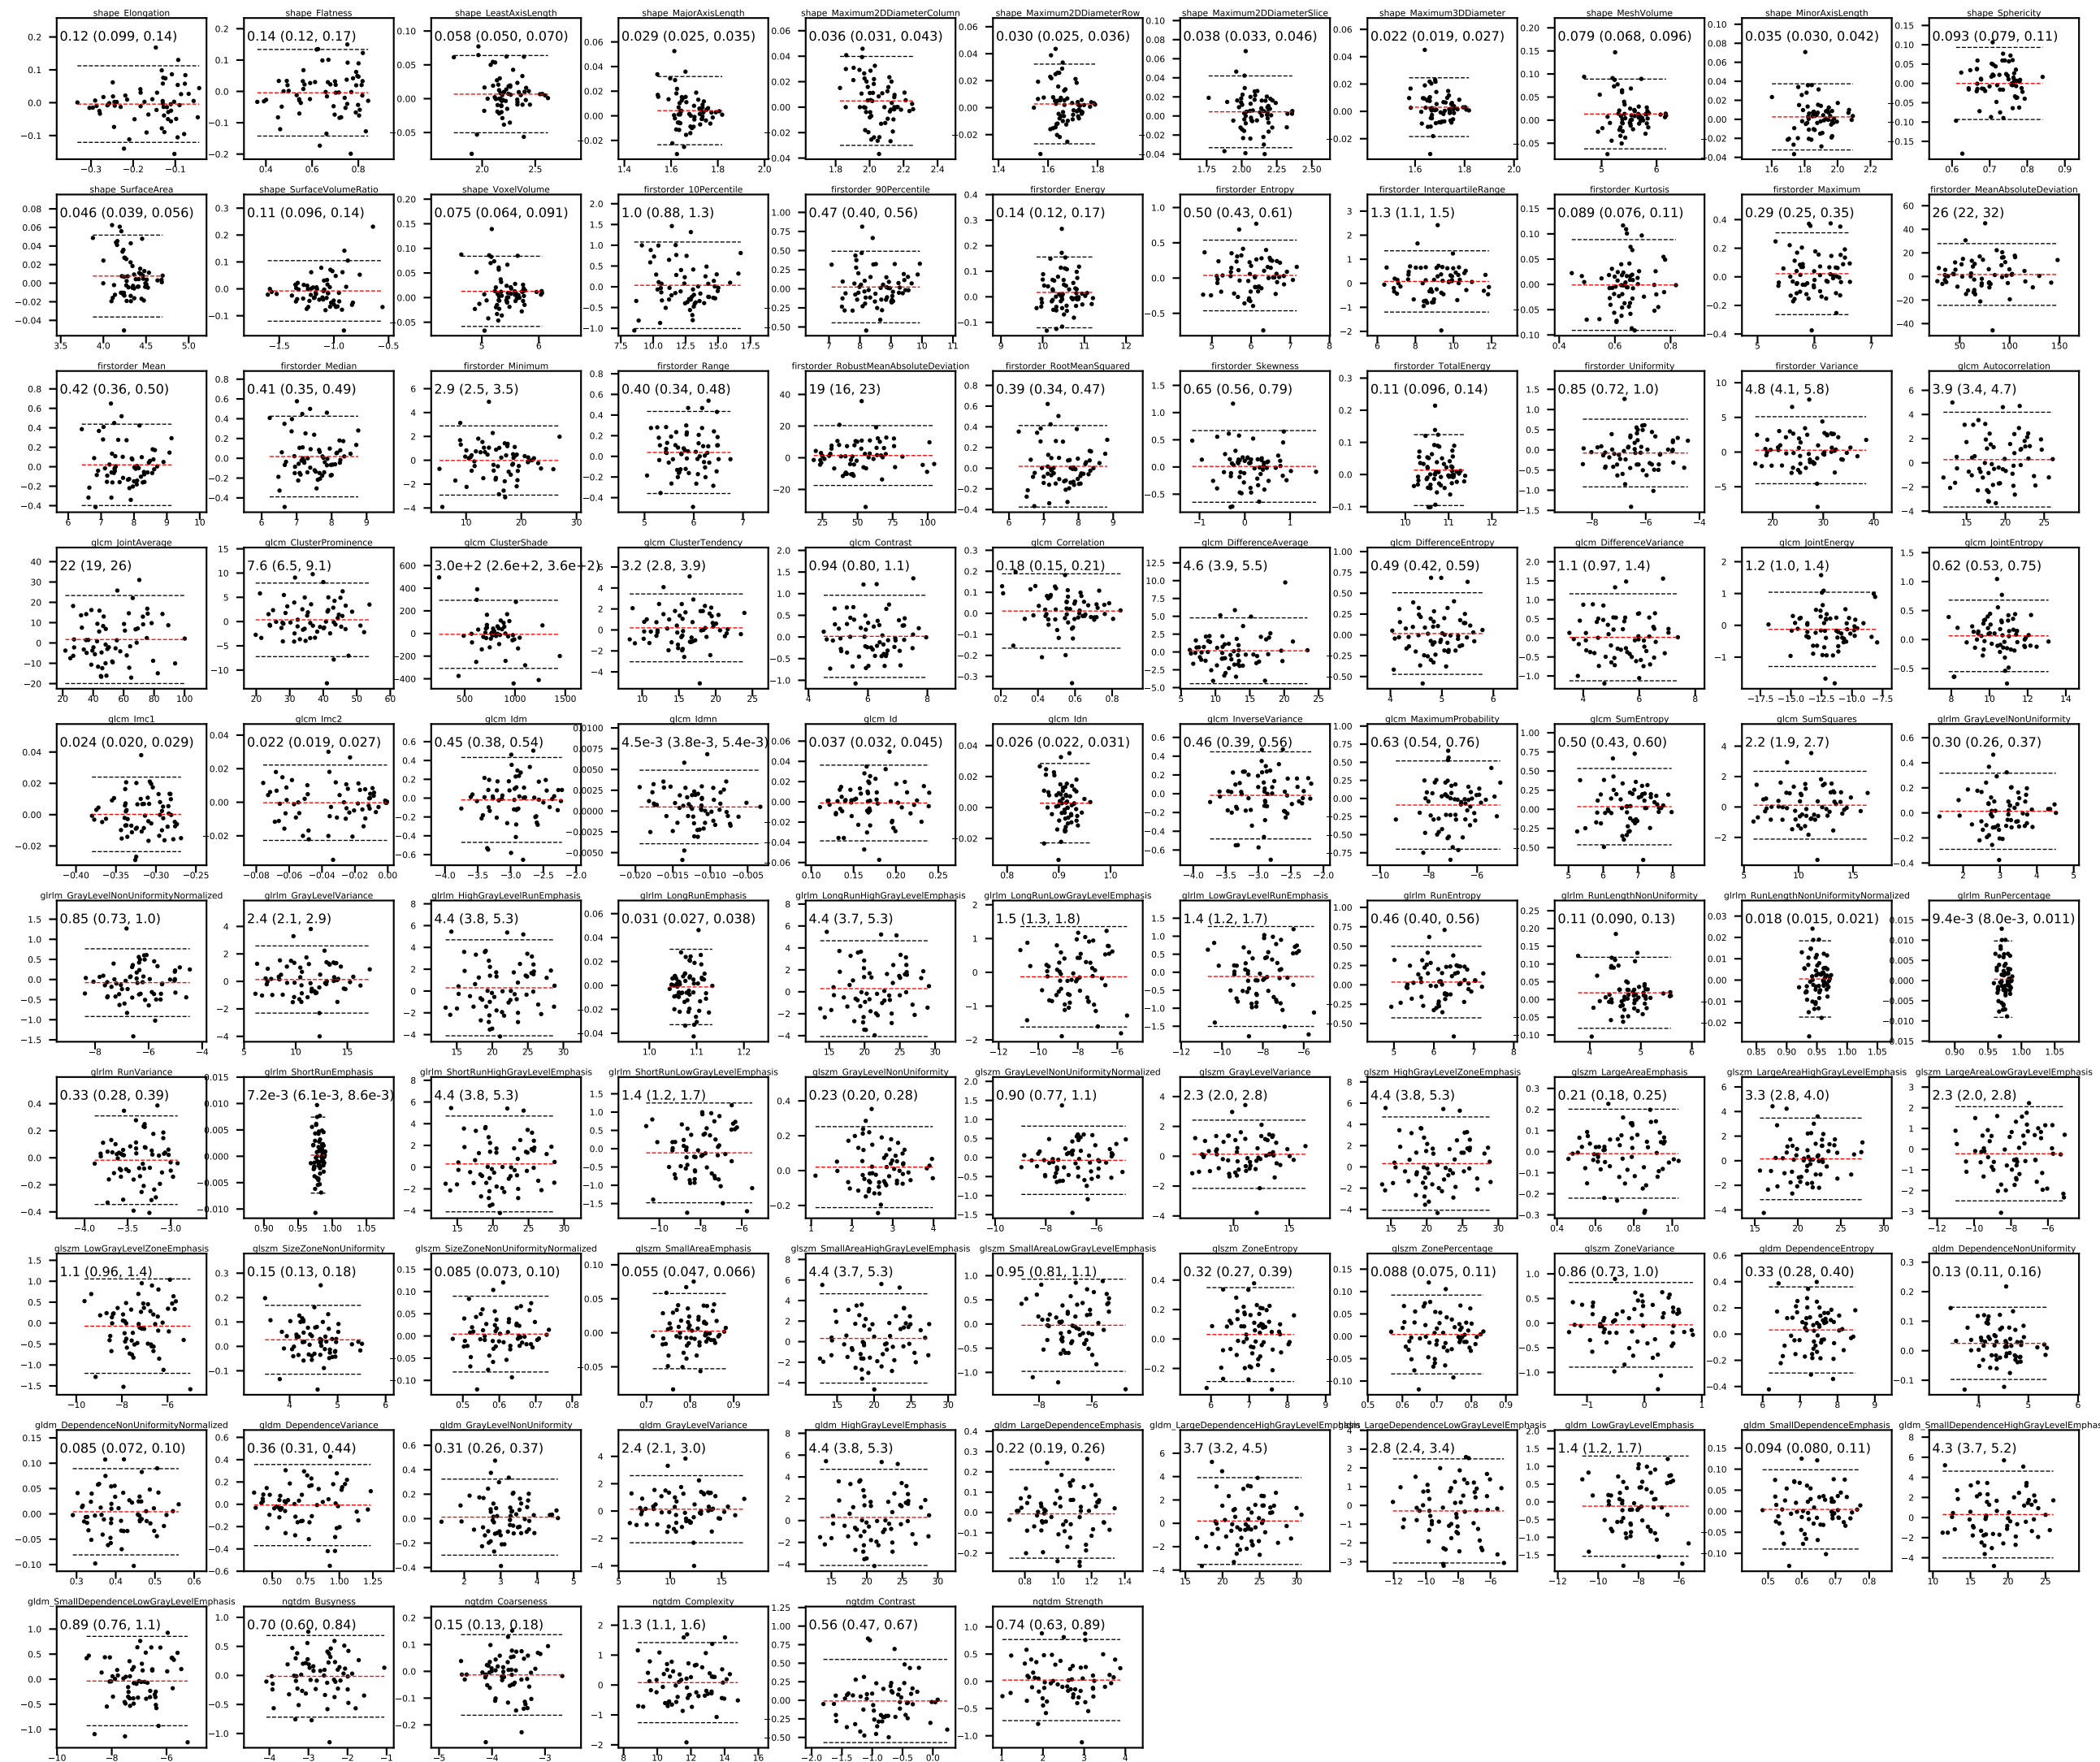

Supplement: s1 [file s1]
